# Supplementary material for: Selective synthesis of nitrogen bi-heteroarenes by a hydrogen transfer-mediated direct α,β-coupling reaction
Source: Royal Society of Chemistry journal article supplement (doi:10.1039/c7ob01434a), 2017-01-01

# Supporting Information

## Selective Synthesis of Nitrogen Bi-heteroarenes by a Hydrogen Transfer-Mediated Direct $\alpha$ , $\beta$ -Coupling Reaction

Xiu-Wen Chen,<sup>a</sup> He Zhao,<sup>a</sup> Biao Xiong,<sup>a</sup> Huan-Feng Jiang,<sup>a</sup> Pierre. H. Dixneuf<sup>b</sup> and Min Zhang<sup>a,\*</sup>

<sup>a</sup>Key Lab of Functional Molecular Engineering of Guangdong Province, School of Chemistry and Chemical Engineering, South China University of Technology, Guangzhou 510641, China

<sup>b</sup>Centre of Catalysis and Green Chemistry-OMC, Institut Sciences Chimiques de Rennes UMR 6226-CNRS-Universite de Rennes 1, Campus de Beaulieu, 35042 Rennes (France)

### Table of contents

|                                                             |         |
|-------------------------------------------------------------|---------|
| 1. General information.....                                 | S2      |
| 2. Substrates preparation.....                              | S2-S4   |
| 3. Typical procedure for the synthesis of <b>2aa'</b> ..... | S4      |
| 4. Deuterium labeling experiment.....                       | S8      |
| 5. Analytical data of the obtained<br>compounds.....        | S9-S15  |
| 6. The application of the obtained<br>compounds.....        | S15     |
| 7. NMR spectra of products<br>.....                         | S16-S35 |

## 1. General information

All the obtained products were characterized by melting points (m.p.), <sup>1</sup>H-NMR, <sup>13</sup>C-NMR and infrared spectra (IR). Melting points were measured on an Electrothermal SGW-X4 microscopy digital melting point apparatus and are uncorrected. IR spectra were recorded on a FT/IR-2000 spectrometer. <sup>1</sup>H-NMR and <sup>13</sup>C-NMR spectra were obtained on Bruker-400 and referenced to 7.27 ppm for chloroform solvent with TMS as internal standard (0 ppm). Chemical shifts were reported in parts per million (ppm, δ) downfield from tetramethylsilane. Proton coupling patterns are described as singlet (s), doublet (d), triplet (t), multiplet (m). TLC was performed using commercially prepared 100-400 mesh silica gel plates (GF254), and visualization was effected at 254 nm. Unless otherwise stated, all the reagents were purchased from commercial sources (J&KChem, TCI, Fluka, Acros, SCRC), used without further purification.

## 2. Substrates preparation

The preparation of 1,8-naphthyridines **1**. **4** (5 mmol), **5** (5 mmol), *t*-BuOK (20 mol %), and ethanol (10 mL) were introduced in a flask (50 mL). Then, it was stirred at 50 °C under atmosphere for 2 hours. After cooling down to room temperature, the reaction mixture was concentrated by removing the solvent under vacuum, and the residue was purified by column chromatography.

**Scheme S1.** Synthesis of substrates 1,8-naphthyridines

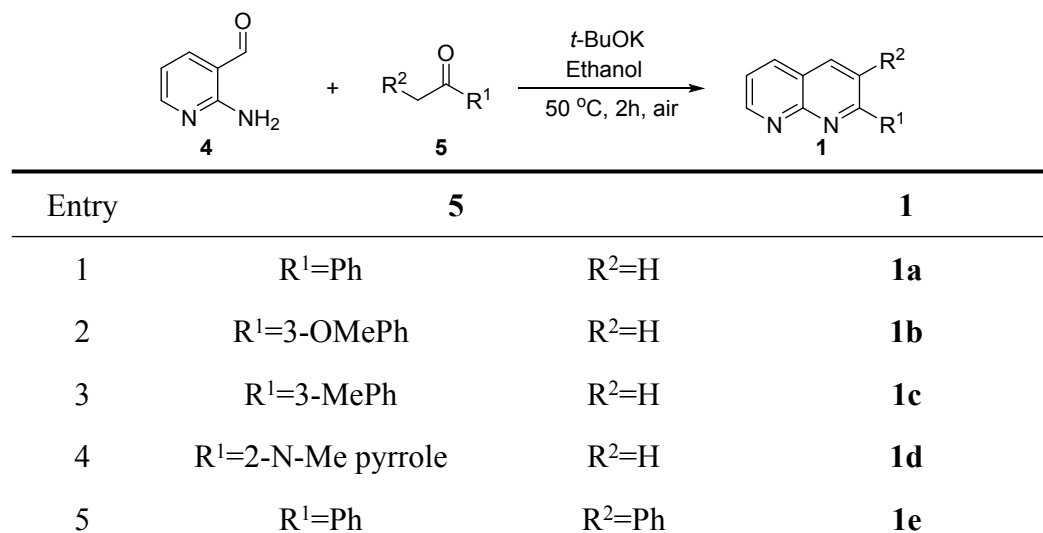

|    |                                          |                                                 |           |
|----|------------------------------------------|-------------------------------------------------|-----------|
| 6  | R <sup>1</sup> =4-OMePh                  | R <sup>2</sup> =4-OMePh                         | <b>1f</b> |
| 7  | R <sup>1</sup> =H                        | R <sup>2</sup> =H                               | <b>1g</b> |
| 8  | R <sup>1</sup> =CH <sub>3</sub>          | R <sup>2</sup> =H                               | <b>1h</b> |
| 9  | R <sup>1</sup> =Ph                       | R <sup>2</sup> =CH <sub>3</sub>                 | <b>1i</b> |
| 10 | R <sup>1</sup> =Ph                       | R <sup>2</sup> =CH <sub>3</sub> CH <sub>2</sub> | <b>1j</b> |
| 11 | R <sup>1</sup> =2-FPh                    | R <sup>2</sup> =CH <sub>3</sub>                 | <b>1k</b> |
| 12 | 3,4-dihydronaphthalen-1(2 <i>H</i> )-one |                                                 | <b>1l</b> |

### 3-methyl-2-(p-tolyl)-1,8-naphthyridine

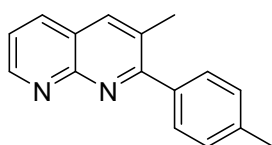

Yellow solid, 89% yield, m.p.: 134-135 °C; <sup>1</sup>H NMR (400 MHz, CDCl<sub>3</sub>): δ 9.04 (s, 1H), 8.10 (d, *J* = 7.8 Hz, 1H), 7.99 (s, 1H), 7.62 (d, *J* = 6.9 Hz, 2H), 7.40 (dd, *J* = 7.9, 4.1 Hz, 1H), 7.28 (d, *J* = 7.2 Hz, 2H), 2.52 (s, 3H), 2.42 (s, 3H). <sup>13</sup>C NMR (101 MHz, CDCl<sub>3</sub>): δ 163.36, 154.81, 152.82, 138.46, 137.67, 137.24, 135.92, 130.64, 129.27, 128.74, 121.78, 121.71, 21.35, 20.73. IR (KBr): 3036, 2963, 1601, 1476, 1452, 1305, 1248, 799 cm<sup>-1</sup>. MS (EI, m/z): 234 [M]<sup>+</sup>.

### 2-(2-fluorophenyl)-3-methyl-1,8-naphthyridine

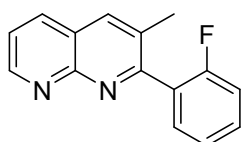

White oil, 69% yield; <sup>1</sup>H NMR (400 MHz, CDCl<sub>3</sub>): δ 9.07 (s, 1H), 8.15 (d, *J* = 8.1 Hz, 1H), 8.03 (s, 1H), 7.59 (t, *J* = 7.4 Hz, 1H), 7.44 (dd, *J* = 12.8, 8.5 Hz, 2H), 7.28 (t, *J* = 7.7 Hz, 1H), 7.16 (t, *J* = 9.2 Hz, 1H), 2.42 (s, 3H). <sup>13</sup>C NMR (101 MHz, CDCl<sub>3</sub>): δ 160.92, 159.43, 158.47, 154.64, 152.96, 136.52 (d, *J* = 342.0 Hz), 132.00, 131.59 (d, *J* = 14.4 Hz), 130.56 (d, *J* = 32 Hz), 128.12 (d, *J* = 84 Hz), 124.34 (d, *J* = 13.6 Hz), 122.20 (d, *J* = 22.4 Hz), 115.53, 115.31, 18.98 (d, *J* = 18.4 Hz). IR (KBr): 3045, 2287, 1598, 1550, 1484, 1446, 1215, 1108, 1010, 798, 783 cm<sup>-1</sup>. MS (EI, m/z): 238 [M]<sup>+</sup>.

### 2,3-bis(4-methoxyphenyl)-1,8-naphthyridine

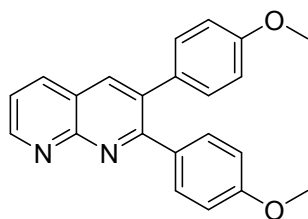

Yellow solid, 76% yield, m.p.: 130-131 °C; <sup>1</sup>H NMR (400 MHz, CDCl<sub>3</sub>): δ 9.08(s, 1H), 8.16

(d,  $J = 6.8$  Hz, 1H), 8.07(s, 1H), 7.54 (d,  $J = 6.8$  Hz, 2H), 7.43 (m, 1H), 7.19 (d,  $J = 6.8$  Hz, 2H), 6.86 (d,  $J = 6.8$  Hz, 2H), 6.79(d,  $J = 6.8$  Hz, 2H), 3.81(s, 3H), 3.79(s, 3H).  $^{13}\text{C}$  NMR (101 MHz,  $\text{CDCl}_3$ ):  $\delta$  160.93, 159.96, 159.13, 155.12, 153.37, 138.16, 136.52, 135.16, 132.17, 131.96, 130.73, 121.88, 121.46, 113.96, 113.20, 55.27, 55.20. IR (KBr): 3014, 2285, 1596, 1515, 1250, 1180, 1029, 841  $\text{cm}^{-1}$ . MS (EI,  $m/z$ ): 342  $[\text{M}]^+$ .

### 3. Typical procedure for the synthesis of 2aa'

Condition: under  $\text{N}_2$  atmosphere, 2-phenyl-1,8-naphthyridine 1a (0.2 mmol), Isopropanol (0.6 mmol),  $\text{Pd}(\text{OAc})_2$  (3 mol %), NaOH (0.2 mmol), and 1,4-dioxane (1.0 mL) were introduced in a Schlenk tube (50 mL) equipped with a gas-releasing meter. Then, the Schlenk tube was closed and the resulting mixture was stirred at 125  $^\circ\text{C}$  for 16 h. After cooling down to room temperature, the reaction mixture was concentrated by removing the solvent under vacuum. Finally, the residue was purified by preparative TLC on silica to give 7,7'-diphenyl-2,3'-bi(1,8-naphthyridine) 2aa'.

**Scheme S2.** Substrates employed for synthesizing target product

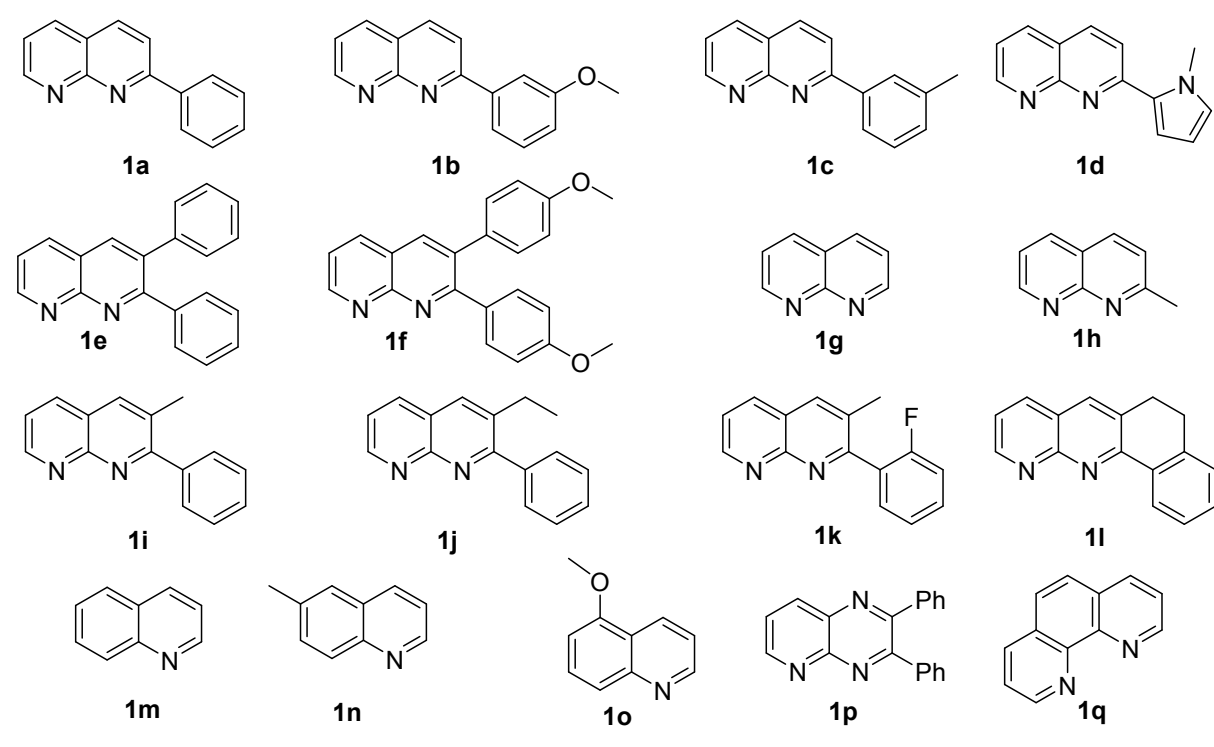

**Table S2.** Synthesis of substituted product <sup>a</sup>

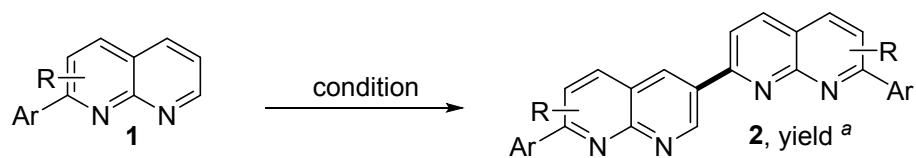

| entry | 1         | product 2, Yield <sup>a</sup> [%] |
|-------|-----------|-----------------------------------|
| 1     | <b>1a</b> | <b>2aa'</b> , 63%, 16 h           |
| 2     | <b>1b</b> | <b>2bb'</b> , 42%, 16 h           |
| 3     | <b>1c</b> | <b>2cc'</b> , 42%, 16 h           |
| 4     | <b>1d</b> | <b>2dd'</b> , 21%, 16 h           |
| 5     | <b>1e</b> | <b>2ee'</b> , 74%, 16 h           |
| 6     | <b>1f</b> | <b>2ff'</b> , 71%, 16 h           |
| 7     | <b>1g</b> | <b>2gg'</b> , 34%, 16 h           |
| 8     | <b>1h</b> | <b>2hh'</b> , 31%, 16 h           |
| 9     | <b>1i</b> | <b>2ii'</b> , 62%, 16 h           |
| 10    | <b>1j</b> | <b>2jj'</b> , 52%, 16 h           |
| 11    | <b>1k</b> | <b>2kk'</b> , 42%, 16 h           |
| 12    | <b>1l</b> | <b>2ll'</b> , 31%, 16 h           |
| 13    | <b>1m</b> | <b>2mm'</b> , 30%, 16 h           |
| 14    | <b>1n</b> | <b>2nn'</b> , 41%, 16 h           |
| 15    | <b>1o</b> | <b>2oo'</b> , 36%, 16 h           |
| 16    | <b>1p</b> | <b>2pp'</b> , 48%, 16 h           |
| 17    | <b>1q</b> | <b>2qq'</b> , 32%, 16 h           |

<sup>a</sup>Yield with respect to condition-A: **1** (0.2 mmol), Pd(OAc)<sub>2</sub> (3 mol%), NaOH (0.2 mmol), *i*-propanol (0.6 mmol), 125 °C.

### Scheme S3. Detection of control experiments

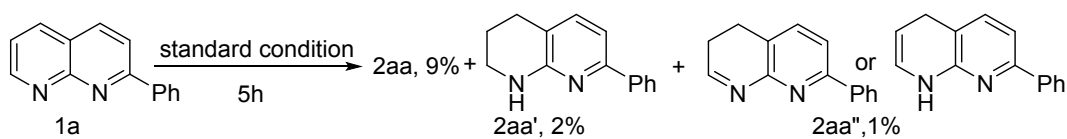

D:\DATA\CXW\cxw-2-1-5h

03/08/17 22:21:54

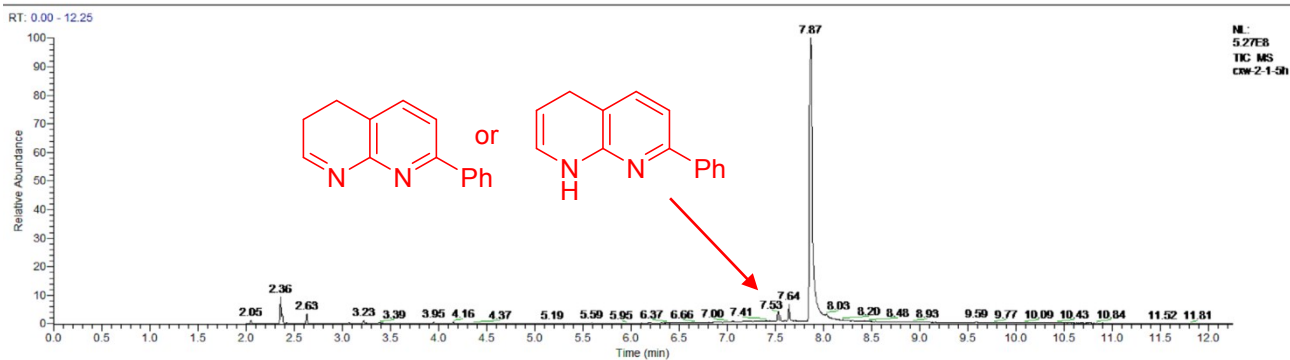

cxw-2-1-5h #1625 RT: 7.52 AV: 1 NL: 8.81E5  
T: + e3 Full ms [50.00-500.00]

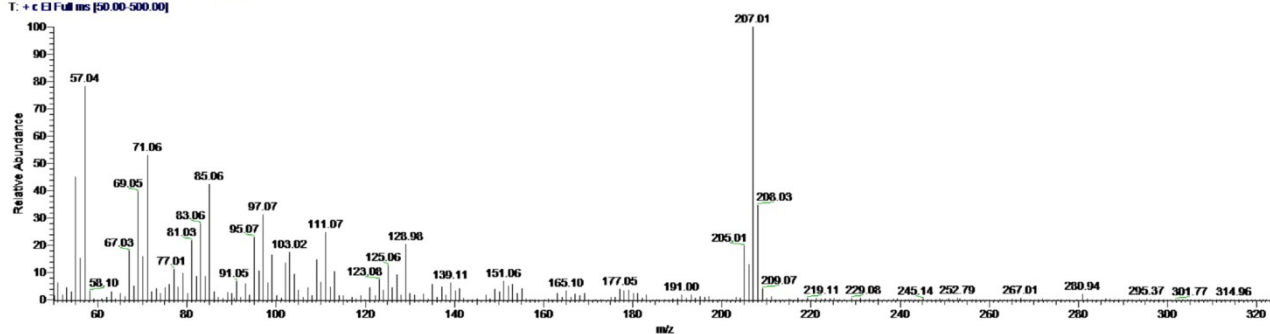

RT: 7.29 - 8.50

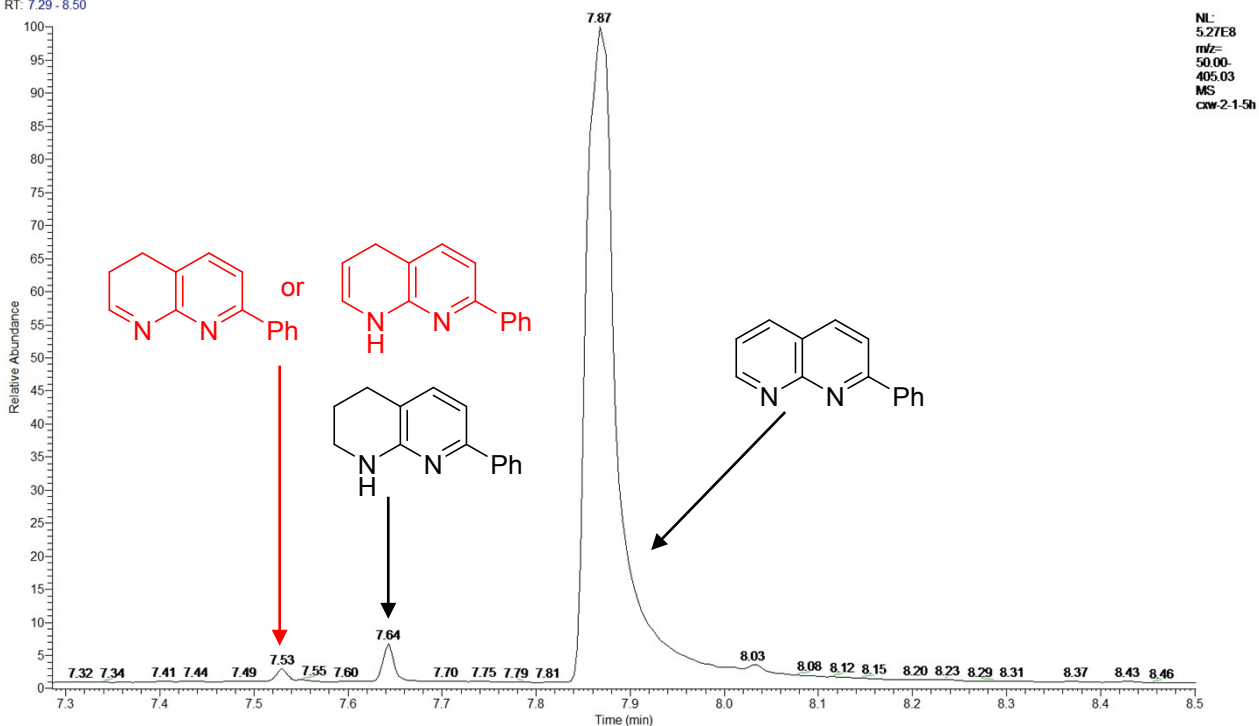

### Analytic data of the side product

$^1\text{H}$  NMR (400 MHz,  $\text{CDCl}_3$ ):  $\delta$  7.97- 7.84 (m, 2H), 7.41 (t,  $J = 11.3, 4.2$  Hz, 2H), 7.37 - 7.30 (m, 1H), 7.21 (d,  $J = 7.5, 0.8$  Hz, 1H), 6.92 (d,  $J = 7.5$  Hz, 1H), 5.14 (s, 1H), 3.42 (t, 2H), 2.75 (t,  $J = 6.3$  Hz, 2H), 1.99 - 1.88 (m, 2H).  $^{13}\text{C}$  NMR (101 MHz,  $\text{CDCl}_3$ ):  $\delta$  155.96, 153.89, 139.87, 136.94, 128.46, 128.16, 126.61, 114.95, 109.66, 41.61, 26.48, 21.49.

### $^1\text{H}$ - NMR spectrum of side product

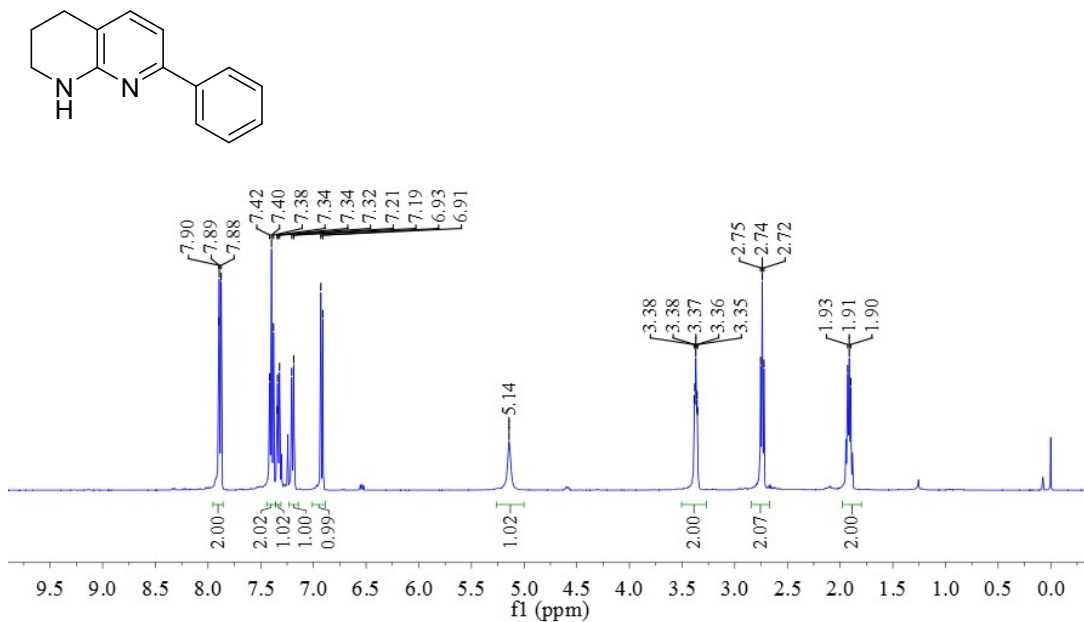

### $^{13}\text{C}$ - NMR spectrum of side product

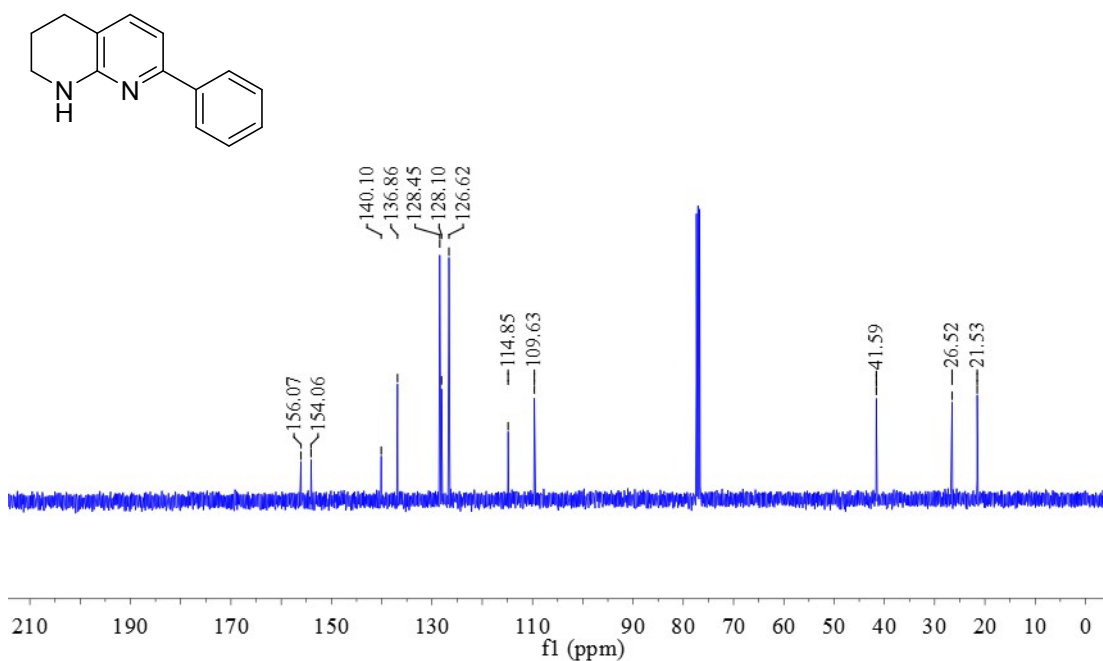

#### 4. Deuterium labeling experiment

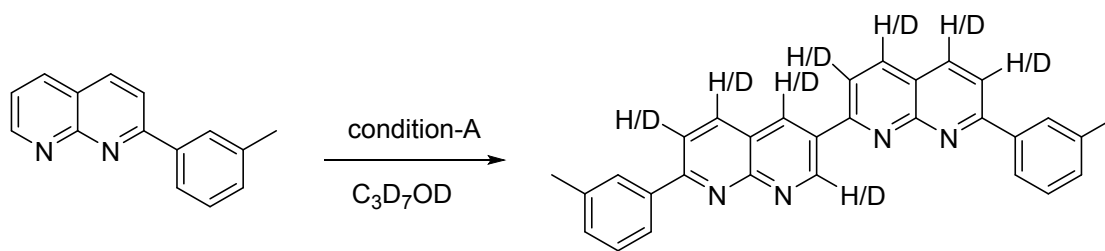

#### $^1H$ - NMR spectrum of deuterated product

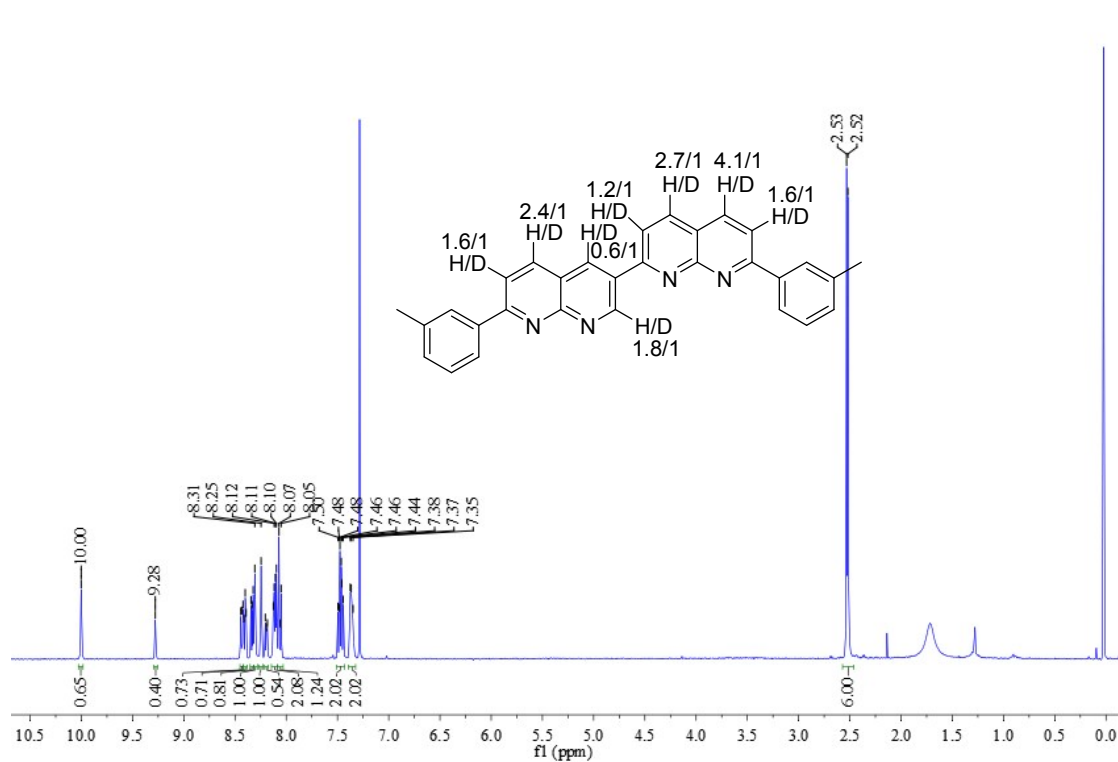



## 5. Analytical data of the obtained compounds

### (1) 7,7'-diphenyl-2,3'-bi(1,8-naphthyridine) (2aa')

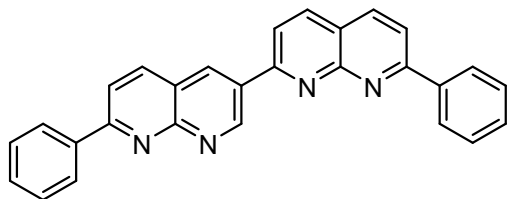

Yellow solid, m.p.: 320.8-322.5 °C; <sup>1</sup>H NMR (400 MHz, CDCl<sub>3</sub>): δ 9.98 (s, 1H), 9.21 (s, 1H), 8.66 - 8.21 (m, 7H), 8.14 (s, 1H), 8.06 (s, 1H), 8.01 (d, *J* = 7.3 Hz, 1H), 7.67 – 7.44 (m, 6H). <sup>13</sup>C NMR (101 MHz, CDCl<sub>3</sub>): δ 161.54, 161.06, 157.37, 156.55, 156.22, 152.91, 138.58, 138.54, 138.33, 138.16, 137.60, 136.32, 131.88, 130.35, 130.26, 128.87, 128.12, 128.02, 121.24, 121.04, 120.24, 119.19. IR (KBr): 3055, 2924, 2853, 1596, 1459, 1301, 1267, 1024, 764, 693 cm<sup>-1</sup>. HRMS (ESI): Calcd. for C<sub>28</sub>H<sub>18</sub>N<sub>4</sub> [M+H]<sup>+</sup>: 411.1604; found: 411.1605.

### (2) 7,7'-di-*m*-tolyl-2,3'-bi(1,8-naphthyridine) (2bb')

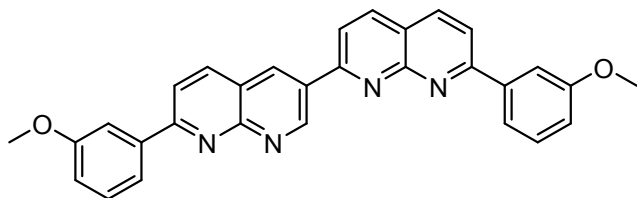

Yellow solid, m.p.: 266-267 °C; <sup>1</sup>H NMR (400 MHz, CDCl<sub>3</sub>): δ 9.98 (s, 1H), 9.19 (s, 1H), 8.36 (t, *J* = 9.7 Hz, 2H), 8.29 (d, *J* = 8.4 Hz, 1H), 8.14 (d, *J* = 8.3 Hz, 1H), 8.07 – 7.97 (m, 3H), 7.93 (s, 1H), 7.83 (t, *J* = 6.7 Hz, 2H), 7.45 (q, *J* = 8.0 Hz, 2H), 7.11 – 7.02 (m, 2H), 3.97 (s, 3H), 3.96 (s, 3H). <sup>13</sup>C NMR (101 MHz, CDCl<sub>3</sub>): 161.43, 160.94, 160.26, 160.21, 157.41, 156.54, 156.17, 152.93, 140.04, 139.87, 138.56, 138.19, 137.58, 136.31, 131.95, 129.82, 129.77, 121.39, 121.16, 120.52, 120.50, 120.45, 120.41, 119.23, 117.04, 116.67, 113.01, 112.62, 55.60. IR (KBr): 2956, 2924, 2853, 1600, 1530, 1477, 1455, 1289, 1245, 1213, 1038, 855, 813, 781 cm<sup>-1</sup>. HRMS (ESI): Calcd. for C<sub>30</sub>H<sub>22</sub>N<sub>4</sub>O<sub>2</sub> [M+H]<sup>+</sup>: 471.1816; found: 471.1806.

### (3) 7,7'-bis(3-methoxyphenyl)-2,3'-bi(1,8-naphthyridine) (2cc')

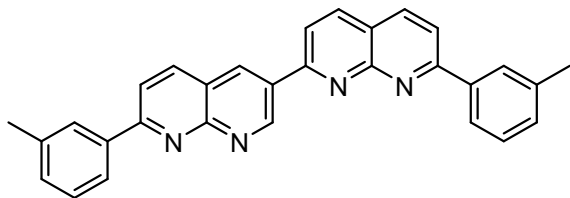

Yellow solid, m.p.: 262-263 °C; <sup>1</sup>H NMR (400 MHz, CDCl<sub>3</sub>): δ 9.96 (s, 1H), 9.15 (s, 1H), 8.33 (dd, *J* = 12.5, 8.5 Hz, 2H), 8.28 - 8.23 (m, 2H), 8.20 (s, 1H), 8.13 - 7.96 (m, 5H), 7.43 (q, *J* = 7.6 Hz, 2H), 7.33 (t, *J* = 6.5 Hz, 2H), 2.50 (s, 3H), 2.48 (s, 3H). <sup>13</sup>C NMR (101 MHz, CDCl<sub>3</sub>): δ 161.65, 161.13, 157.35, 156.58, 156.21, 152.92, 138.64, 138.46, 138.25, 138.10, 137.48, 136.19, 131.81, 131.15, 131.07, 128.86, 128.78, 128.72, 128.70, 125.14, 125.01, 121.18, 120.99, 120.29, 119.11, 21.53, 21.50. IR (KBr): 3036, 2998, 2918, 2850, 1600, 1545, 1437, 1309, 942, 856, 802, 783 cm<sup>-1</sup>. HRMS (ESI): Calcd. for C<sub>30</sub>H<sub>22</sub>N<sub>4</sub> [M+H]<sup>+</sup>: 439.1917; found: 439.1914.

**(4) 7,7'-bis(1-methyl-1H-pyrrol-2-yl)-2,3'-bi(1,8-naphthyridine) (2dd')**

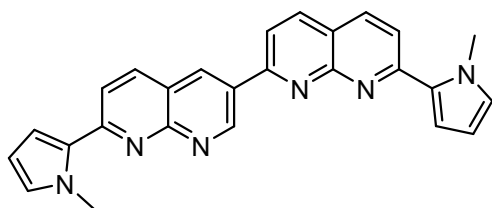

Red-brown solid, m.p.: 123-124 °C; <sup>1</sup>H NMR (400 MHz, CDCl<sub>3</sub>): δ 9.79 (s, 1H), 8.99 (s, 1H), 8.16 (dd, *J* = 15.9, 8.4 Hz, 2H), 8.05 (d, *J* = 8.5 Hz, 1H), 7.96 (d, *J* = 8.3 Hz, 1H), 7.79 (dd, *J* = 15.2, 8.6 Hz, 2H), 6.93 (d, *J* = 3.1 Hz, 1H), 6.87 (s, 3H), 6.25 (s, 2H), 4.34 (s, 6H). <sup>13</sup>C NMR (101 MHz, CDCl<sub>3</sub>): δ 156.02, 155.30, 155.00, 154.77, 151.27, 136.80, 136.19, 135.32, 134.86, 130.48, 130.36, 130.17, 128.44, 128.03, 120.32, 120.26, 119.05, 118.77, 117.19, 113.51, 113.20, 107.35, 107.32, 37.59, 37.03. IR (KBr): 2952, 2924, 2852, 1593, 1542, 1460, 1420, 1378, 1068, 810, 732 cm<sup>-1</sup>. HRMS (ESI): Calcd. for C<sub>26</sub>H<sub>20</sub>N<sub>6</sub> [M+H]<sup>+</sup>: 417.1822; found: 417.1818.

**(5) 6,6',7,7'-tetraphenyl-2,3'-bi(1,8-naphthyridine) (2ee')**

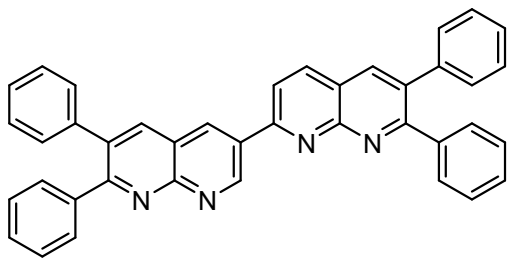

Red-brown solid, m.p.: 269-270 °C; <sup>1</sup>H NMR (400 MHz, CDCl<sub>3</sub>): δ 10.01 (s, 1H), 9.29 (s, 1H), 8.42 (d, *J* = 8.3 Hz, 1H), 8.31 (s, 1H), 8.28 - 8.16 (m, 2H), 7.57 (t, *J* = 8.6 Hz, 4H), 7.41 - 7.23 (m, 16H). <sup>13</sup>C NMR (101 MHz, CDCl<sub>3</sub>): δ 162.68, 162.23, 157.23, 155.54, 155.24, 152.85, 139.57, 139.42, 139.23, 139.10, 138.29, 138.18, 136.37, 136.28, 136.09, 132.39, 130.53, 130.34, 129.70, 128.73, 128.63, 128.52, 128.45, 127.89, 127.79, 127.72, 121.23, 121.08, 119.71. IR (KBr): 3057, 2948, 2837, 1640, 1597, 1457, 1413, 1267, 1024, 739, 701 cm<sup>-1</sup>. HRMS (ESI): Calcd. for C<sub>40</sub>H<sub>26</sub>N<sub>4</sub> [M+H]<sup>+</sup>: 563.2230; found: 563.2234.

**(6) 6,6',7,7'-tetrakis(4-methoxyphenyl)-2,3'-bi(1,8-naphthyridine) (2ff')**

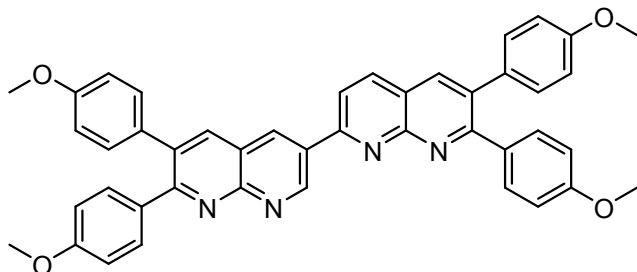

Red-brown solid, m.p.: 273-275 °C; <sup>1</sup>H NMR (400 MHz, CDCl<sub>3</sub>): δ 9.94 (s, 1H), 9.14 (d, *J* = 3.5 Hz, 1H), 8.31 (dd, *J* = 8.2, 3.3 Hz, 1H), 8.18 (d, *J* = 2.3 Hz, 1H), 8.14 - 8.05 (m, 2H), 7.60 - 7.50 (m, 4H), 7.21 (t, *J* = 6.6 Hz, 4H), 6.88 (t, *J* = 8.2 Hz, 4H), 6.81 (t, *J* = 7.5 Hz, 4H), 3.83 (s, 3H), 3.82 (s, 3H), 3.81 (s, 6H). <sup>13</sup>C NMR (101 MHz, CDCl<sub>3</sub>): δ 161.14, 160.65,

159.13, 159.03, 158.23, 158.21, 155.99, 154.49, 154.14, 151.58, 137.80, 136.86, 134.87, 134.72, 134.48, 131.21, 131.06, 130.93, 130.87, 130.70, 129.77, 129.76, 120.02, 119.88, 118.33, 113.04, 112.97, 112.33, 112.22, 54.28, 54.24, 54.22. IR (KBr): 3041, 2998, 2930, 2835, 1596, 1512, 1459, 1441, 1292, 1249, 1175, 1027, 832, 808, 738  $\text{cm}^{-1}$ . HRMS (ESI): Calcd. for  $\text{C}_{44}\text{H}_{34}\text{N}_4\text{O}_4$   $[\text{M}+\text{H}]^+$ : 683.2653; found: 683.2654.

**(7) 2,3'-bi(1,8-naphthyridine) (2gg')**

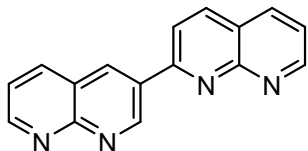

Yellow solid, m.p.: 170-151  $^{\circ}\text{C}$ ;  $^1\text{H}$  NMR (400 MHz,  $\text{CDCl}_3$ ):  $\delta$  9.98 (d,  $J = 2.4$  Hz, 1H), 9.24 (d,  $J = 2.5$  Hz, 1H), 9.22 - 9.15 (m, 2H), 8.39 (d,  $J = 8.5$  Hz, 1H), 8.36 (dd,  $J = 8.1, 1.9$  Hz, 1H), 8.27 (dd,  $J = 8.1, 1.9$  Hz, 1H), 8.21 (d,  $J = 8.5$  Hz, 1H), 7.60 - 7.52 (m, 2H).  $^{13}\text{C}$  NMR (101 MHz,  $\text{CDCl}_3$ ):  $\delta$  156.77, 156.57, 156.08, 154.45, 154.45, 152.53, 138.64, 138.04, 136.96, 136.64, 132.10, 122.82, 122.47, 122.45, 122.18, 119.44. IR (KBr): 3054, 2987, 1599, 1563, 1441, 1425, 1265, 850, 813, 741  $\text{cm}^{-1}$ . HRMS (ESI): Calcd. for  $\text{C}_{16}\text{H}_{10}\text{N}_4$   $[\text{M}+\text{Na}]^+$ : 281.0798; found: 281.0796.

**(8) 7,7'-dimethyl-2,3'-bi(1,8-naphthyridine) (2hh')**

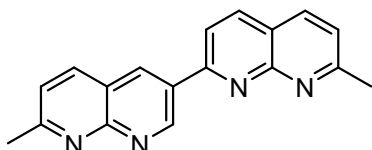

Red-brown oil;  $^1\text{H}$  NMR (400 MHz,  $\text{CDCl}_3$ ):  $\delta$  9.91 (s, 1H), 9.21 (s, 1H), 8.31 (d,  $J = 8.4$  Hz, 1H), 8.21 (d,  $J = 8.2$  Hz, 1H), 8.13 (d,  $J = 7.9$  Hz, 2H), 7.43 (t,  $J = 8.1$  Hz, 2H), 2.87 (s, 3H), 2.85 (s, 3H).  $^{13}\text{C}$  NMR (101 MHz,  $\text{CDCl}_3$ ):  $\delta$  164.09, 164.06, 156.78, 156.37, 155.93, 152.24, 138.09, 137.69, 136.70, 136.21, 131.57, 123.65, 123.27, 120.44, 120.11, 118.54, 25.83, 25.78. IR (KBr): 2975, 2922, 2852, 1601, 1554, 1434, 1264, 1085, 1047, 879, 851, 804, 742  $\text{cm}^{-1}$ . HRMS (ESI): Calcd. for  $\text{C}_{18}\text{H}_{14}\text{N}_4$   $[\text{M}+\text{Na}]^+$ : 309.1111; found: 309.1106.

**(9) 6,6'-dimethyl-7,7'-diphenyl-2,3'-bi(1,8-naphthyridine) (2ii')**

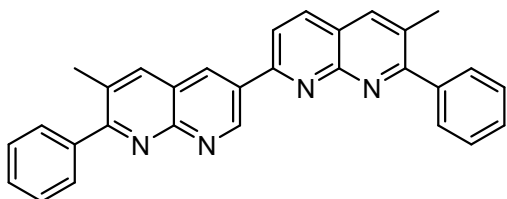

Yellow solid, m.p.: 288-289  $^{\circ}\text{C}$ ;  $^1\text{H}$  NMR (400 MHz,  $\text{CDCl}_3$ ):  $\delta$  9.90 (s, 1H), 9.15 (s, 1H), 8.30 (d,  $J = 8.4$  Hz, 1H), 8.13 (d,  $J = 7.9$  Hz, 2H), 8.07 (s, 1H), 7.73 (d,  $J = 7.3$  Hz, 2H), 7.69 (d,  $J = 7.3$  Hz, 2H), 7.55 - 7.44 (m, 6H), 2.56 (s, 3H), 2.53 (s, 3H).  $^{13}\text{C}$  NMR (101 MHz,  $\text{CDCl}_3$ ): 164.64, 164.11, 156.57, 155.18, 154.75, 152.02, 140.07, 139.98, 138.49, 137.47, 137.37, 135.37, 132.11, 131.25, 131.07, 129.33, 129.06, 128.71, 128.65, 128.20, 128.08, 121.40, 121.22, 119.31, 20.75, 20.60. IR (KBr): 2956, 2924, 2852, 1600, 1545, 1489, 1267, 1009, 811, 774, 732  $\text{cm}^{-1}$ . HRMS (ESI): Calcd. for  $\text{C}_{30}\text{H}_{22}\text{N}_4$   $[\text{M}+\text{H}]^+$ : 439.1917; found: 439.1913.

**(10) 6,6'-diethyl-7,7'-diphenyl-2,3'-bi(1,8-naphthyridine) (2jj')**

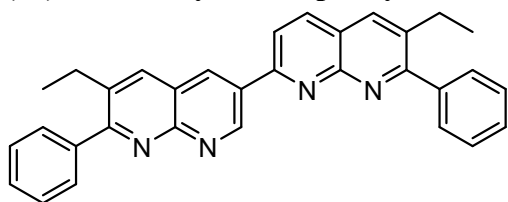

Yellow solid, m.p.: 286-287 °C; <sup>1</sup>H NMR (400 MHz, CDCl<sub>3</sub>): δ 9.91 (d, *J* = 2.4 Hz, 1H), 9.25 (d, *J* = 2.4 Hz, 1H), 8.37 (d, *J* = 8.4 Hz, 1H), 8.24 - 8.17 (m, 2H), 8.14 (s, 1H), 7.72 - 7.61 (m, 4H), 7.52 - 7.44 (m, 6H), 2.97 - 2.85 (m, 4H), 1.29 - 1.22 (m, 6H). <sup>13</sup>C NMR (101 MHz, CDCl<sub>3</sub>): δ 164.84, 164.37, 156.65, 154.90, 154.51, 152.01, 140.12, 140.06, 137.58, 137.33, 137.15, 136.67, 135.71, 135.62, 132.17, 129.11, 128.89, 128.55, 128.50, 128.18, 128.10, 121.61, 121.40, 119.28, 25.99, 14.62, 14.59. IR (KBr): 3057, 2975, 2928, 1600, 1453, 1417, 1267, 1048, 740, 702 cm<sup>-1</sup>. HRMS (ESI): Calcd. for C<sub>32</sub>H<sub>26</sub>N<sub>4</sub> [M+H]<sup>+</sup>: 467.2230; found: 467.2228.

**(11) 7,7'-bis(2-fluorophenyl)-6,6'-dimethyl-2,3'-bi(1,8-naphthyridine) (2kk')**

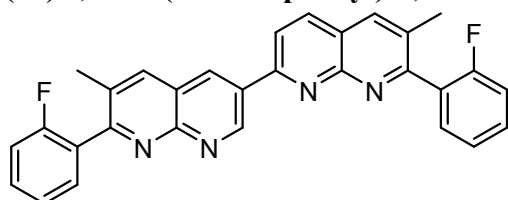

Brown solid, m.p.: 272-273 °C; <sup>1</sup>H NMR (400 MHz, CDCl<sub>3</sub>): δ 9.93 (d, *J* = 1.9 Hz, 1H), 9.15 (d, *J* = 2.1 Hz, 1H), 8.31 (d, *J* = 8.4 Hz, 1H), 8.18 - 8.10 (m, 2H), 8.07 (s, 1H), 7.67 - 7.56 (m, 2H), 7.50 - 7.41 (m, 2H), 7.33 - 7.25 (m, 2H), 7.23 - 7.11 (m, 2H), 2.45 (s, 3H), 2.44 (s, 3H). <sup>13</sup>C NMR (101 MHz, CDCl<sub>3</sub>): δ 160.39 (d, *J* = 27.3 Hz), 159.47 (d, *J* = 249.5 Hz), 156.45, 155.06, 154.60, 152.09, 137.66, 137.55, 136.78, 135.40, 132.69, 132.44, 132.26, 131.66 (d, *J* = 3.5 Hz), 131.37 (d, *J* = 3.5 Hz), 130.69 (d, *J* = 8.1 Hz), 128.03 (d, *J* = 16.2 Hz), 124.46 (d, *J* = 3.4 Hz), 124.38 (d, *J* = 3.3 Hz), 121.76, 121.58, 119.58, 115.61 (d, *J* = 6.1 Hz), 115.39 (d, *J* = 6.2 Hz), 19.13 (s), 19.08 (s). IR (KBr): 2976, 2928, 2897, 1638, 1602, 1489, 1452, 1416, 1268, 1088, 1048, 880, 740 cm<sup>-1</sup>. HRMS (ESI): Calcd. for C<sub>30</sub>H<sub>20</sub>F<sub>2</sub>N<sub>4</sub> [M+H]<sup>+</sup>: 475.1729; found: 475.1734.

**(12) 5,5',6,6'-tetrahydro-9,10'-binaphtho[1,2-b][1,8]naphthyridine (2ll')**

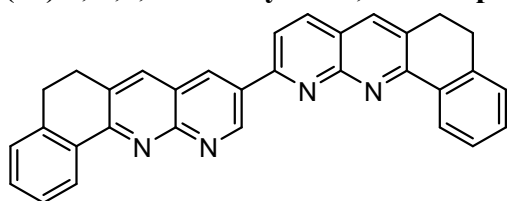

Brown solid, m.p.: 295-298 °C; <sup>1</sup>H NMR (400 MHz, CDCl<sub>3</sub>): δ 9.86 (s, 1H), 9.17 (s, 1H), 8.79 (s, 2H), 8.27 (d, *J* = 8.0 Hz, 1H), 8.09 (s, 2H), 7.99 (s, 1H), 7.52 - 7.38 (m, 4H), 7.33 - 7.22 (m, 2H), 3.33 - 3.14 (m, 4H), 3.13 - 2.98 (m, 4H). <sup>13</sup>C NMR (101 MHz, CDCl<sub>3</sub>): δ 157.51, 157.43, 156.53, 155.82, 151.63, 139.73, 139.63, 137.47, 135.85, 135.27, 134.51, 133.98, 133.91, 132.66, 132.35, 131.89, 130.71, 127.94, 127.44, 127.40, 127.34, 121.96, 121.68, 119.05, 28.68, 28.65, 28.15, 28.13. IR (KBr): 2923, 2852, 1595, 1498, 1467, 1411, 1265, 783,

740  $\text{cm}^{-1}$ . HRMS (ESI): Calcd. for  $\text{C}_{32}\text{H}_{22}\text{N}_4$   $[\text{M}+\text{H}]^+$ : 463.1917; found: 463.1917.

**(13) 2,3'-biquinoline (2mm')**

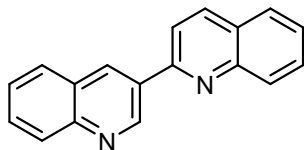

Brown solid, m.p.: 175-176  $^{\circ}\text{C}$ ;  $^1\text{H}$  NMR (400 MHz,  $\text{CDCl}_3$ ):  $\delta$  9.78 (d,  $J = 2.1$  Hz, 1H), 8.95 (d,  $J = 1.6$  Hz, 1H), 8.33 (d,  $J = 8.6$  Hz, 1H), 8.24 (dd,  $J = 15.0, 8.5$  Hz, 2H), 8.05 (d,  $J = 8.6$  Hz, 1H), 8.01 (d,  $J = 8.1$  Hz, 1H), 7.90 (d,  $J = 8.1$  Hz, 1H), 7.80 (t,  $J = 7.6$  Hz, 2H), 7.67 - 7.56 (m, 2H).  $^{13}\text{C}$  NMR (101 MHz,  $\text{CDCl}_3$ ):  $\delta$  154.45, 149.54, 148.46, 147.93, 137.27, 134.88, 132.17, 130.36, 130.11, 129.79, 129.02, 128.63, 127.90, 127.60, 127.40, 127.23, 126.88, 118.65. IR (KBr): 3054, 2923, 2850, 1729, 1682, 1602, 1498, 1427, 1372, 1309, 1265, 1123, 1102, 967, 827, 745  $\text{cm}^{-1}$ . MS (EI,  $m/z$ ): 256.1  $[\text{M}]^+$ .

**(14) 6,6'-dimethyl-2,3'-biquinoline (2nn')**

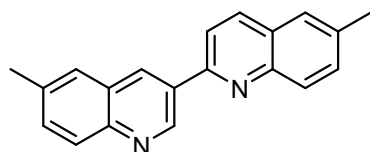

Brown solid, m.p.: 208-209  $^{\circ}\text{C}$ ;  $^1\text{H}$  NMR (400 MHz,  $\text{CDCl}_3$ ):  $\delta$  9.68 (d,  $J = 2.1$  Hz, 1H), 8.81 (s, 1H), 8.21 (d,  $J = 8.6$  Hz, 1H), 8.13 (d,  $J = 8.4$  Hz, 1H), 8.10 (d,  $J = 8.6$  Hz, 1H), 7.97 (d,  $J = 8.6$  Hz, 1H), 7.73 (s, 1H), 7.66 - 7.58 (m, 3H), 2.59 (s, 3H), 2.58 (s, 3H).  $^{13}\text{C}$  NMR (101 MHz,  $\text{CDCl}_3$ ):  $\delta$  153.84, 148.77, 147.06, 146.68, 137.00, 136.75, 136.46, 133.89, 132.47, 132.33, 132.25, 129.44, 128.78, 127.95, 127.37, 126.42, 118.68, 21.64. IR (KBr): 3008, 2921, 2851, 1627, 1503, 1431, 1354, 1301, 1124, 967, 919, 829, 636  $\text{cm}^{-1}$ . MS (EI,  $m/z$ ): 284.13  $[\text{M}]^+$ .

**(15) 5,5'-dimethoxy-2,3'-biquinoline (2oo')**

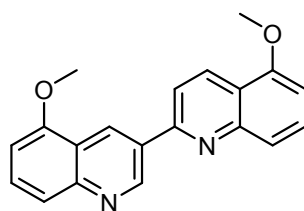

Brown oil;  $^1\text{H}$  NMR (400 MHz,  $\text{CDCl}_3$ ):  $\delta$  9.79 (d,  $J = 2.3$  Hz, 1H), 9.28 (d,  $J = 2.0$  Hz, 1H), 8.68 (d,  $J = 8.8$  Hz, 1H), 8.01 (d,  $J = 8.8$  Hz, 1H), 7.81 (d,  $J = 8.5$  Hz, 1H), 7.77 (d,  $J = 8.5$  Hz, 1H), 7.69 - 7.63 (m, 2H), 6.91 (d,  $J = 7.7$  Hz, 1H), 6.87 (d,  $J = 7.7$  Hz, 1H), 4.07 (s, 3H), 4.04 (s, 3H).  $^{13}\text{C}$  NMR (101 MHz,  $\text{CDCl}_3$ ):  $\delta$  9.79 (d,  $J = 2.3$  Hz, 1H), 9.28 (d,  $J = 2.0$  Hz, 1H), 8.68 (d,  $J = 8.8$  Hz, 1H), 8.01 (d,  $J = 8.8$  Hz, 1H), 7.81 (d,  $J = 8.5$  Hz, 1H), 7.77 (d,  $J = 8.5$  Hz, 1H), 7.69 - 7.63 (m, 2H), 6.91 (d,  $J = 7.7$  Hz, 1H), 6.87 (d,  $J = 7.7$  Hz, 1H), 4.07 (s, 3H), 4.04 (s, 3H). IR (KBr): 3451, 3006, 1643, 1626, 1583, 1467, 1371, 1307, 1255, 1163, 1097, 1025, 991, 918, 805, 749  $\text{cm}^{-1}$ . HRMS (ESI): Calcd. for  $\text{C}_{20}\text{H}_{16}\text{N}_2\text{O}_2$   $[\text{M}+\text{H}]^+$ : 317.1285; found: 317.1288.

**(16) 2,2',3,3'-tetraphenyl-6,7'-bipyrido[2,3-b]pyrazine (2pp')**

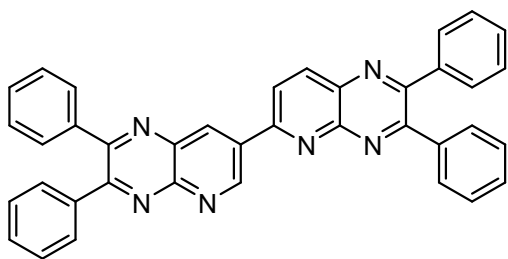

Red oil;  $^1\text{H}$  NMR (400 MHz,  $\text{CDCl}_3$ ): 10.25 (s, 1H), 9.25 (d,  $J = 2.1$  Hz, 1H), 8.69 (d,  $J = 8.6$  Hz, 1H), 8.41 (d,  $J = 8.6$  Hz, 1H), 7.71 - 7.65 (m, 4H), 7.63 - 7.57 (m, 4H), 7.44 - 7.39 (m, 7H), 7.38 - 7.32 (m, 5H).  $^{13}\text{C}$  NMR (101 MHz,  $\text{CDCl}_3$ ):  $\delta$  157.86, 156.92, 155.85, 155.27, 154.35, 153.94, 150.00, 149.72, 145.22, 138.44, 138.34, 138.10, 138.05, 137.30, 136.05, 133.83, 130.28, 130.24, 130.06, 129.90, 129.64, 129.54, 129.50, 129.45, 129.27, 128.44, 128.36, 128.29, 128.22, 126.20. IR (KBr): 3035, 2979, 2923, 1591, 1543, 1458, 1442, 1384, 1328, 1189, 1022, 820, 769  $\text{cm}^{-1}$ . HRMS (ESI): Calcd. for  $\text{C}_{38}\text{H}_{24}\text{N}_6$   $[\text{M}+\text{H}]^+$ : 565.2135; found: 565.2135.

**(17) 2,3'-bi(1,10-phenanthroline) (2qq')**

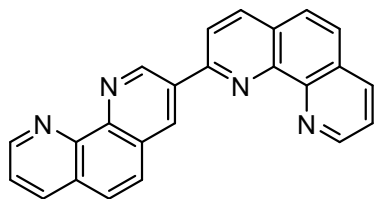

Yellow solid, m.p.: 207-208  $^{\circ}\text{C}$ ;  $^1\text{H}$  NMR (400 MHz,  $\text{CDCl}_3$ ): 9.87 (s, 1H), 9.46 (s, 1H), 9.26 (d,  $J = 2.9$  Hz, 1H), 9.20 (d,  $J = 3.1$  Hz, 1H), 8.39 (d,  $J = 8.3$  Hz, 1H), 8.31 (d,  $J = 8.4$  Hz, 1H), 8.26 (t,  $J = 6.7$  Hz, 2H), 8.02 (d,  $J = 8.8$  Hz, 1H), 7.86 - 7.75 (m, 3H), 7.68 - 7.60 (m, 2H).  $^{13}\text{C}$  NMR (101 MHz,  $\text{CDCl}_3$ ):  $\delta$  154.53, 150.45, 150.33, 148.90, 146.45, 146.27, 146.15, 146.06, 137.32, 136.30, 136.05, 136.04, 135.78, 134.26, 129.20, 129.10, 128.69, 128.06, 127.33, 126.93, 126.36, 123.21, 120.84. IR (KBr): 3051, 2985, 2953, 1511, 1417, 1266, 854, 740  $\text{cm}^{-1}$ . HRMS (ESI): Calcd. for  $\text{C}_{24}\text{H}_{14}\text{N}_4$   $[\text{M}+\text{H}]^+$ : 359.1291; found: 359.1289.

**(20) mixture of the cross-coupling reaction**

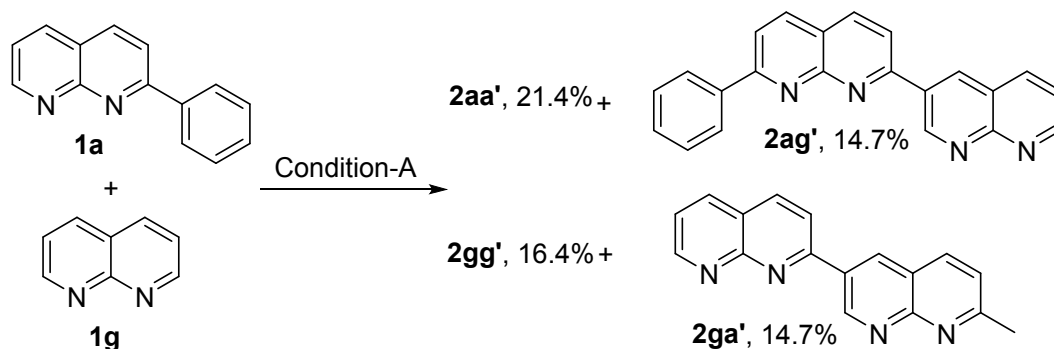

2ag'/2ga', Yellow solid, m.p.: 281-282  $^{\circ}\text{C}$ ;  $^1\text{H}$  NMR (400 MHz,  $\text{CDCl}_3$ ):  $\delta$  10.01 (d,  $J = 2.5$  Hz, 1H), 9.98 (d,  $J = 2.5$  Hz, 1H), 9.29 (d,  $J = 2.5$  Hz, 1H), 9.25 (d,  $J = 2.5$  Hz, 1H), 9.22 (td,  $J = 4.2, 1.9$  Hz, 2H), 8.45 - 8.38 (m, 5H), 8.37 (d,  $J = 1.2$  Hz, 1H), 8.36 - 8.32 (m, 3H), 8.29

(dd,  $J = 8.1, 2.0$  Hz, 1H), 8.24 (d,  $J = 8.5$  Hz, 1H), 8.18 (d,  $J = 8.4$  Hz, 1H), 8.10 (d,  $J = 8.5$  Hz, 1H), 8.07 (d,  $J = 8.5$  Hz, 1H), 7.62 - 7.50 (m, 8H). IR (KBr): 3051, 3031, 2924, 2852, 1599, 1556, 1480, 1440, 1297, 1267, 848, 812, 760  $\text{cm}^{-1}$ . HRMS (ESI): Calcd. for  $\text{C}_{22}\text{H}_{14}\text{N}_4$   $[\text{M}+\text{H}]^+$ : 335.1291; found: 335.1292.

## 6. The application of the obtained compounds

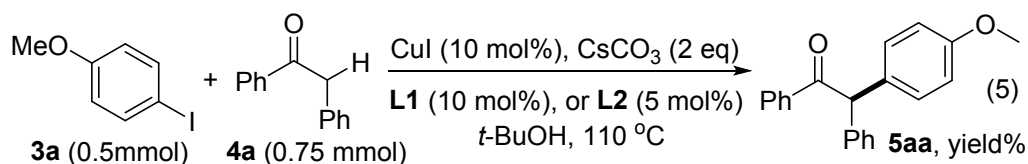

**Table S3.** Comparison of the performance of Copper-catalyzed  $\alpha$ -arylation of deoxybenzoin in  $t\text{BuOH}$  using different ligands **L**.<sup>[a]</sup>

| <b>L</b>                                                                                         | Time(h) | Yield (%) <sup>[b]</sup> |
|--------------------------------------------------------------------------------------------------|---------|--------------------------|
| 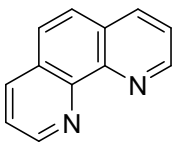<br><b>L1</b>  | 2       | 5.4                      |
|                                                                                                  | 4       | 6.4                      |
|                                                                                                  | 8       | 10.4                     |
|                                                                                                  | 14      | 59.8                     |
|                                                                                                  | 20      | 71.4                     |
|                                                                                                  | 26      | 70.3                     |
| <br><b>L2</b> | 2       | 16.4                     |
|                                                                                                  | 4       | 43.4                     |
|                                                                                                  | 8       | 71.7                     |
|                                                                                                  | 14      | 90.5                     |
|                                                                                                  | 20      | 90.5                     |
|                                                                                                  | 26      | 90.6                     |

[a] Reactions performed on 0.5 mmol scale (ketone/ $\text{ArI}$ =1.5:1). [b] Yields determined by GC/MS.

## 7. NMR spectra of products

### $^1\text{H}$ - NMR spectrum of 2-(2-fluorophenyl)-3-methyl-1,8-naphthyridine

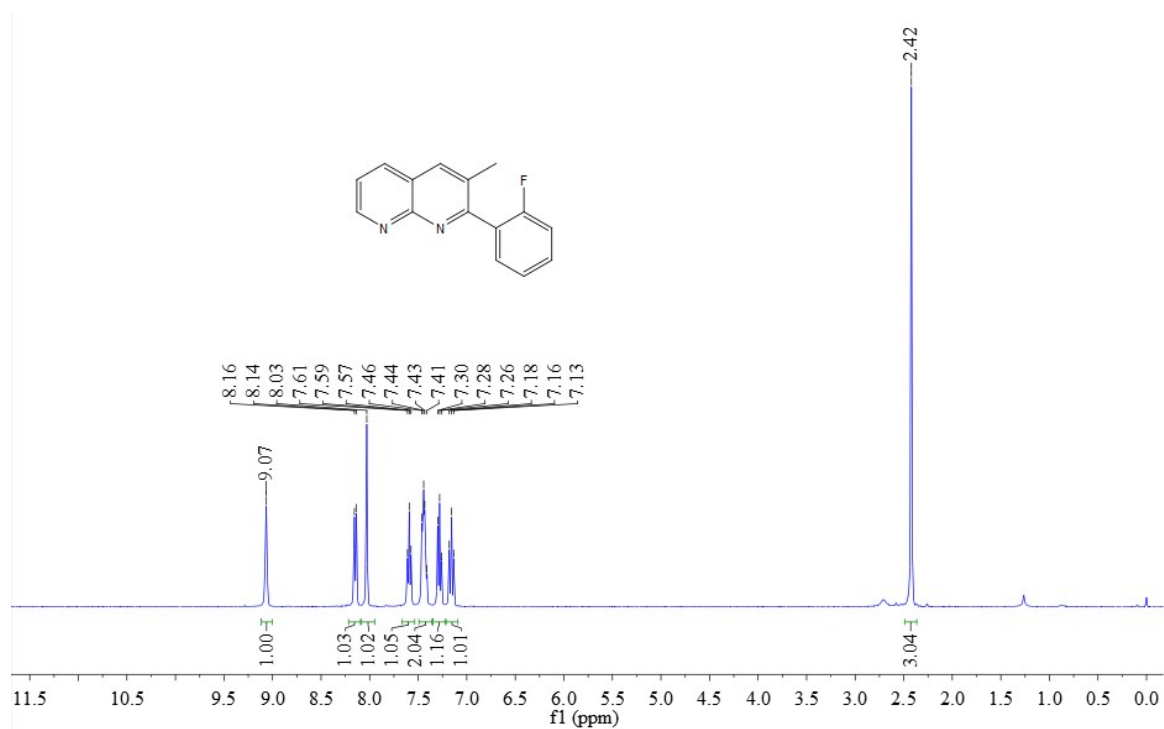

### $^{13}\text{C}$ -NMR spectrum of 2-(2-fluorophenyl)-3-methyl-1,8-naphthyridine

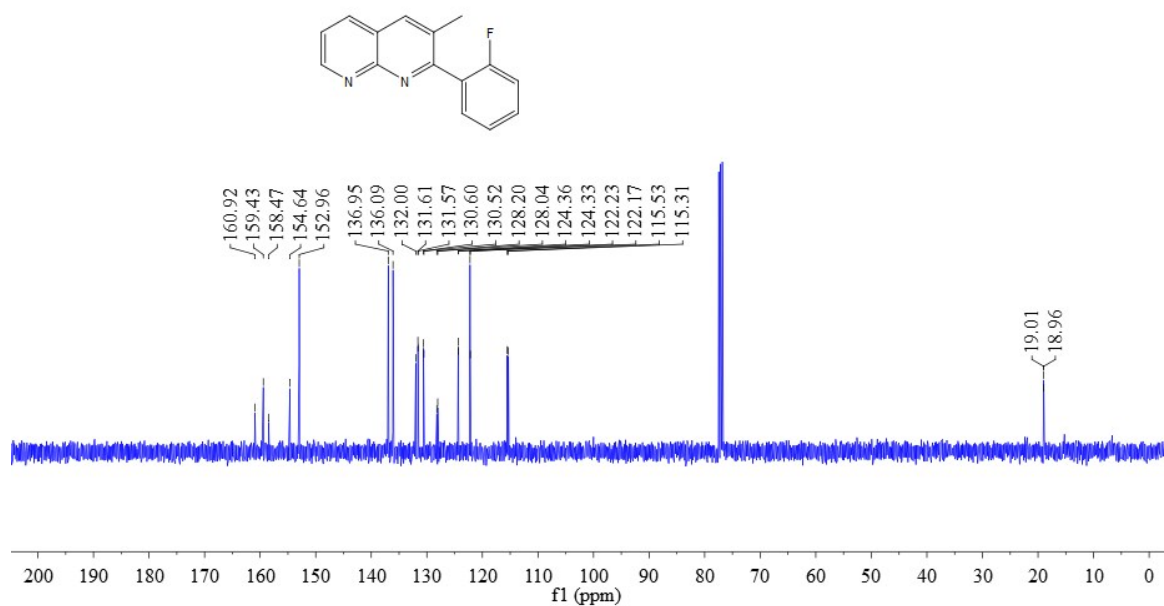



### <sup>1</sup>H-NMR spectrum of 2,3-bis(4-methoxyphenyl)-1,8-naphthyridine

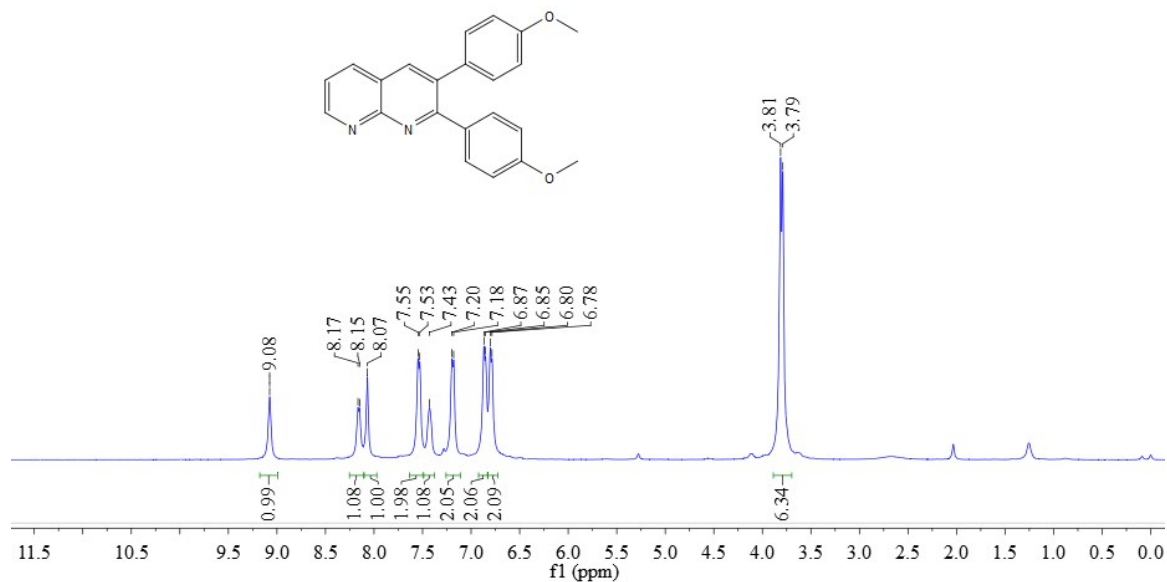

### <sup>13</sup>C-NMR spectrum of 2,3-bis(4-methoxyphenyl)-1,8-naphthyridine

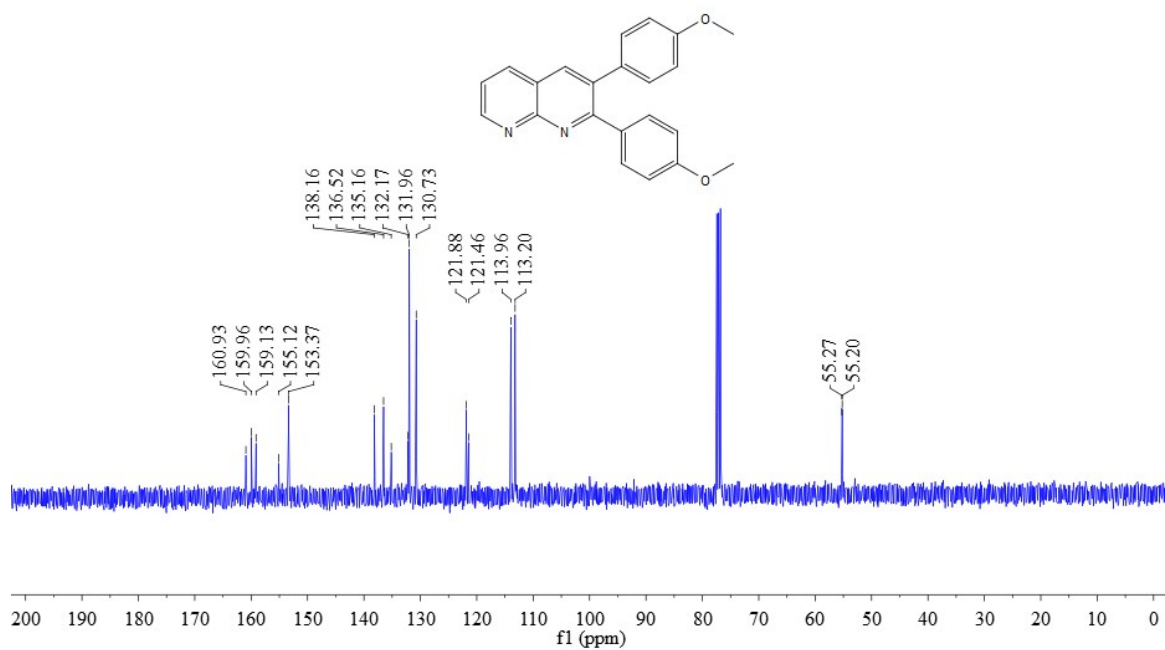

### <sup>1</sup>H-NMR spectrum of 7,7'-diphenyl-2,3'-bi(1,8-naphthyridine) (2aa')

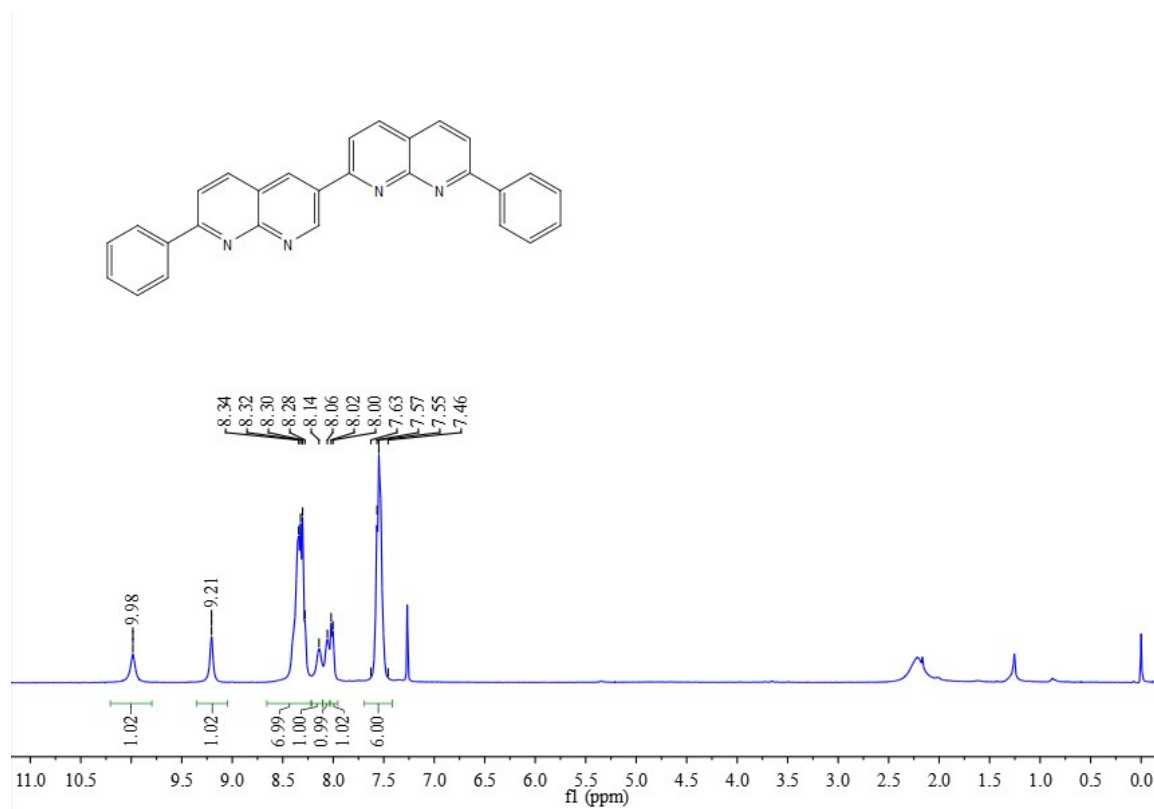

### <sup>13</sup>C-NMR spectrum of 7,7'-diphenyl-2,3'-bi(1,8-naphthyridine) (2aa')

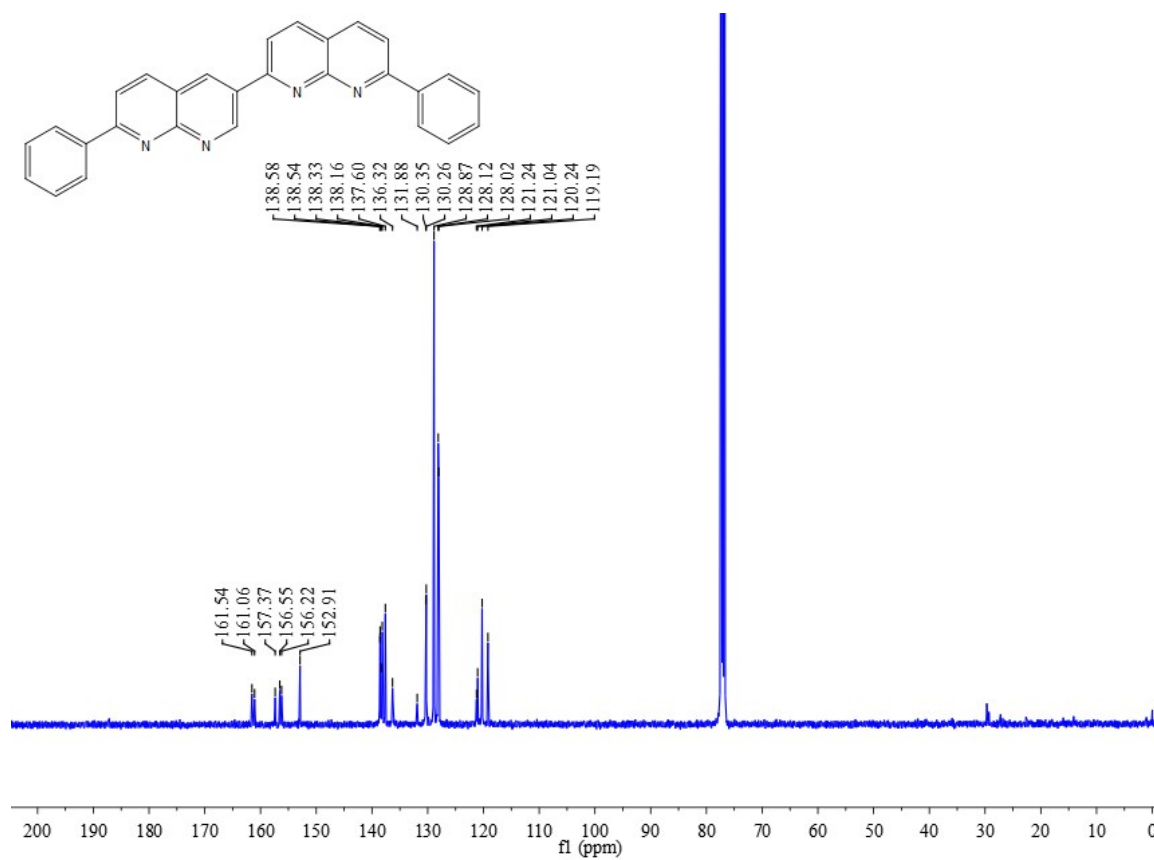

**<sup>1</sup>H-NMR spectrum of 7,7'-bis(3-methoxyphenyl)-2,3'-bi(1,8-naphthyridine) (2bb')**

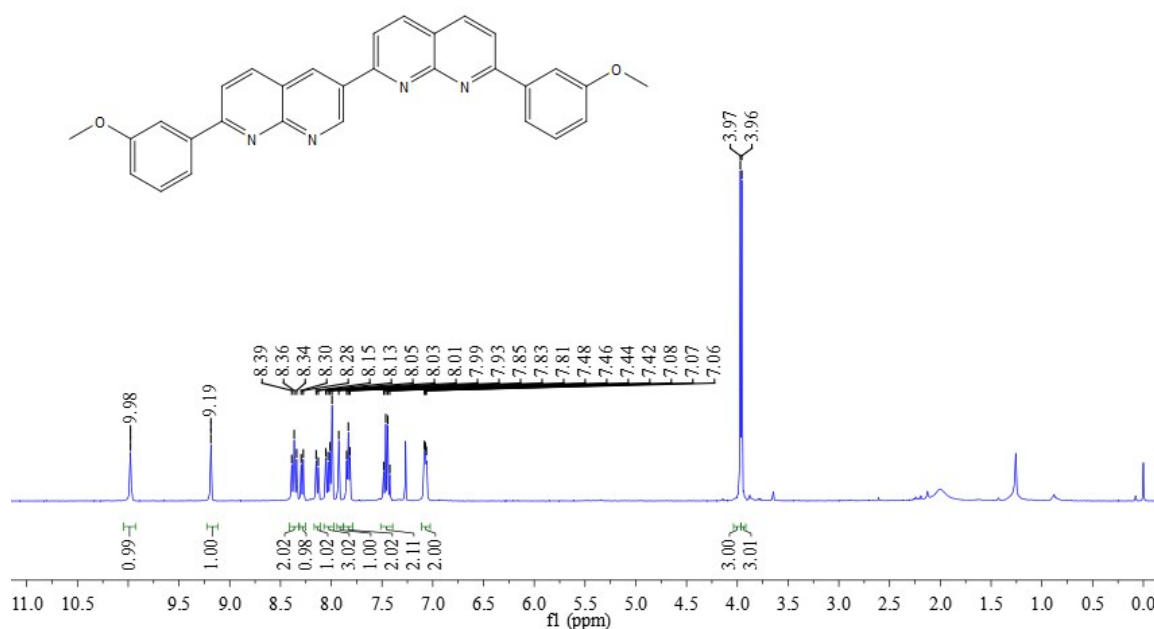

**<sup>13</sup>C-NMR spectrum of 7,7'-bis(3-methoxyphenyl)-2,3'-bi(1,8-naphthyridine) (2bb')**

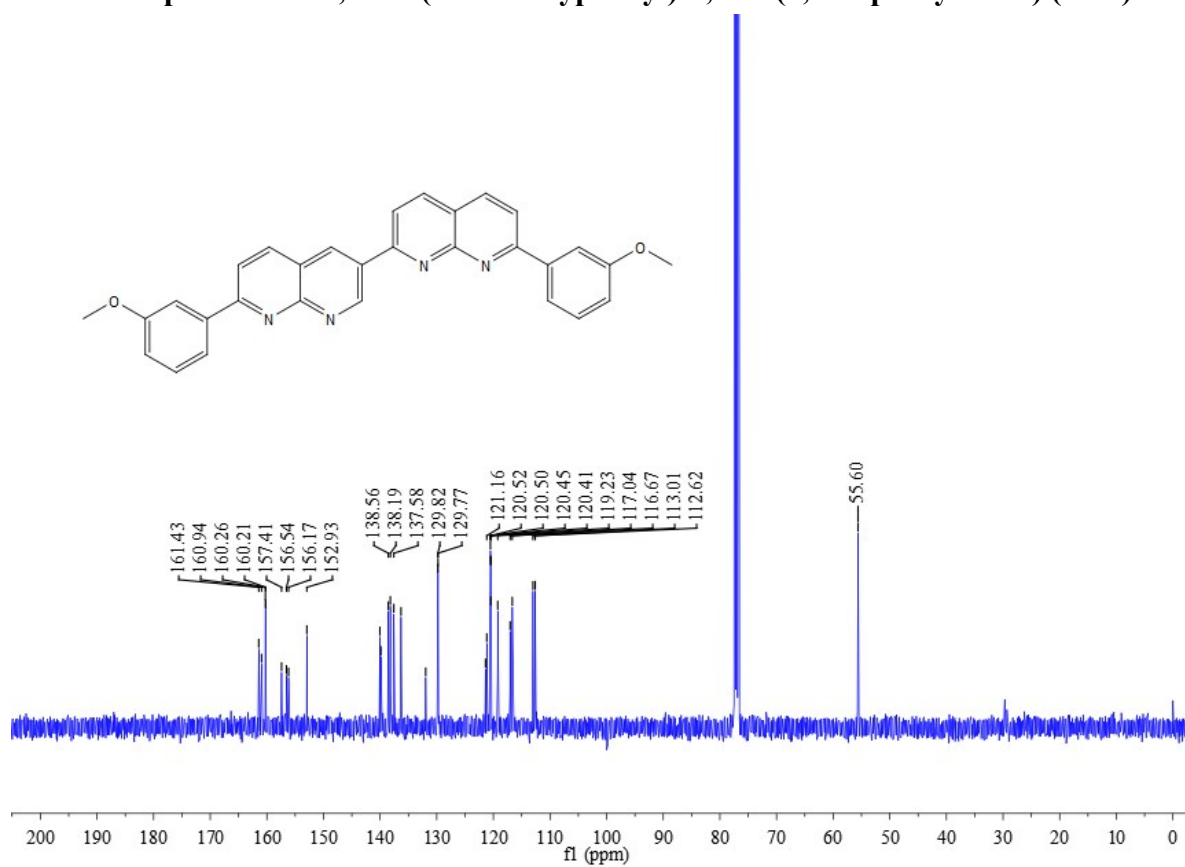

**<sup>1</sup>H-NMR spectrum of 7,7'-di-m-tolyl-2,3'-bi(1,8-naphthyridine) (2cc')**

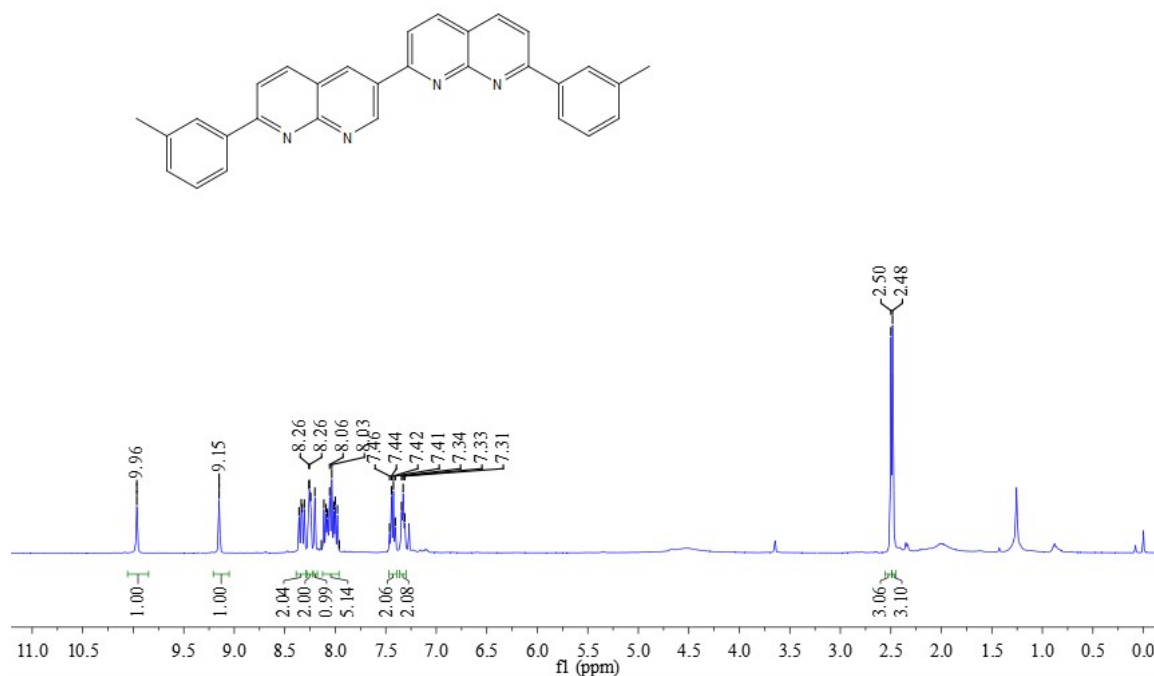

**<sup>13</sup>C-NMR spectrum of 7,7'-di-m-tolyl-2,3'-bi(1,8-naphthyridine) (2cc')**

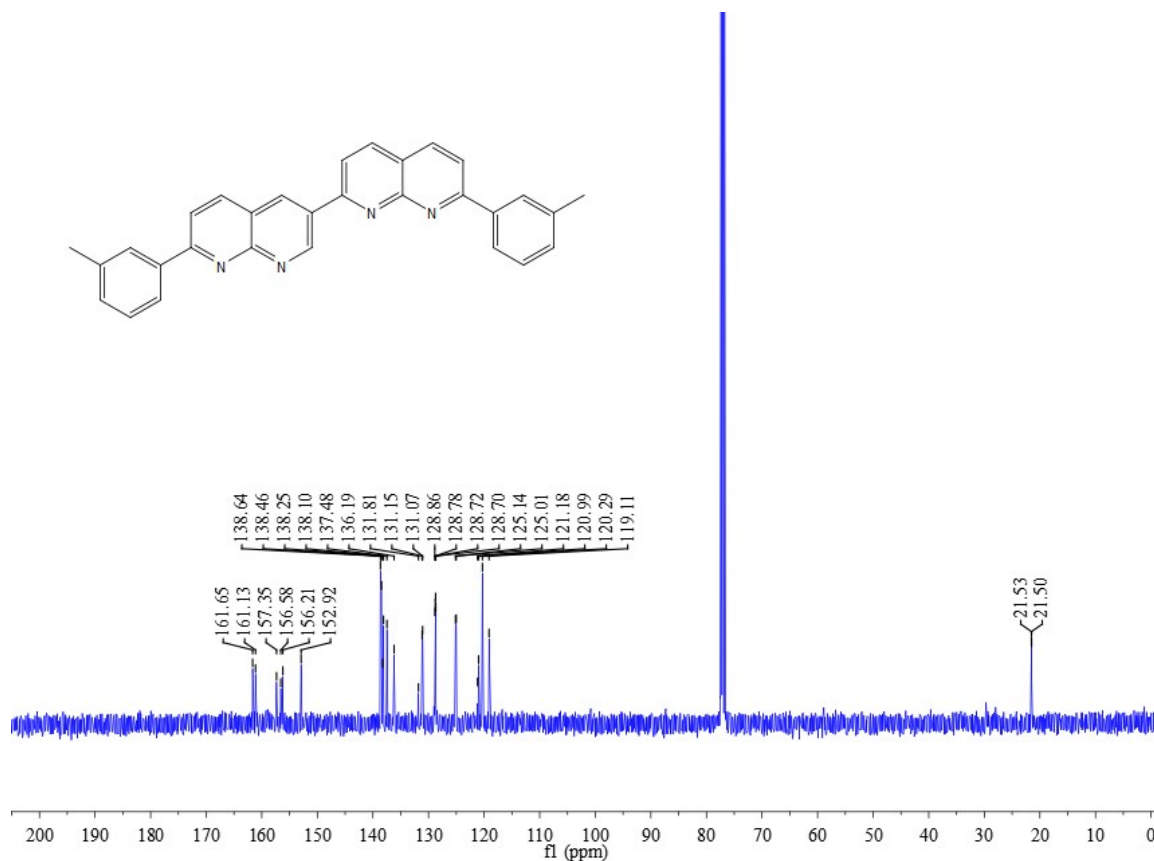

**<sup>1</sup>H-NMR spectrum of 7,7'-bis(1-methyl-1H-pyrrol-2-yl)-2,3'-bi(1,8-naphthyridine) (2dd')**

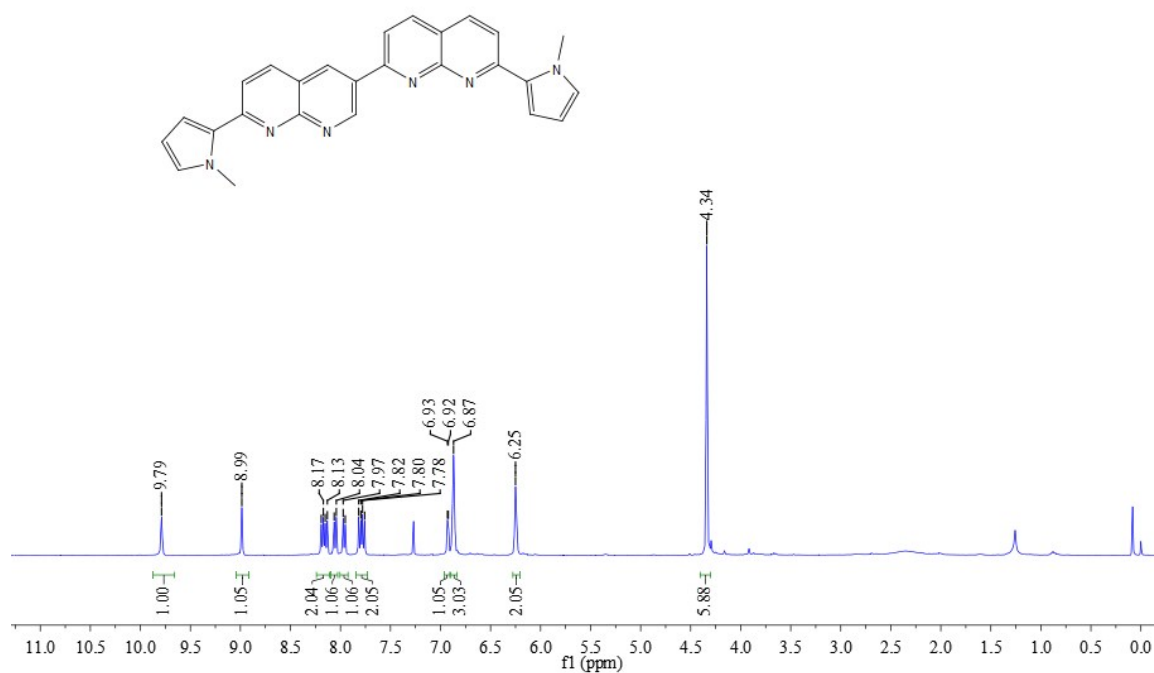

**<sup>13</sup>C-NMR spectrum of 7,7'-bis(1-methyl-1H-pyrrol-2-yl)- 2,3'-bi (1,8-naphthyridine) (2dd')**

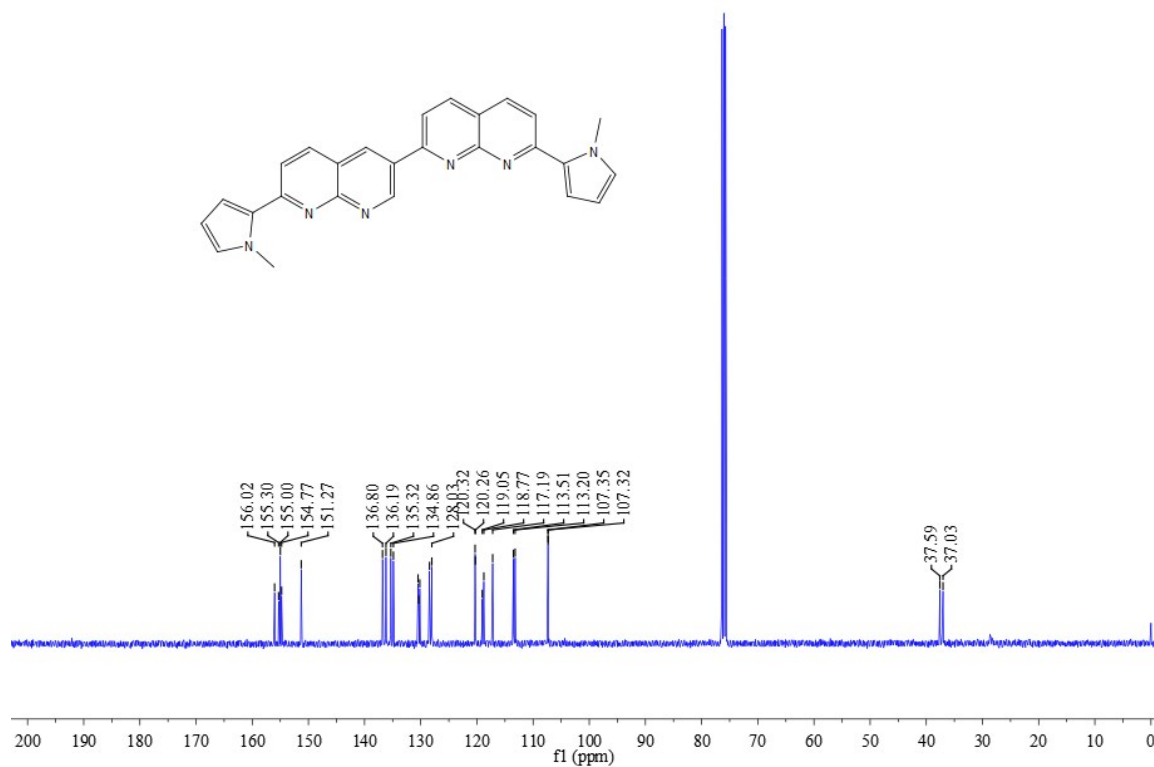

**<sup>1</sup>H-NMR spectrum of 6,6',7,7'-tetraphenyl-2,3'-bi(1,8-naphthyridine) (2ee')**

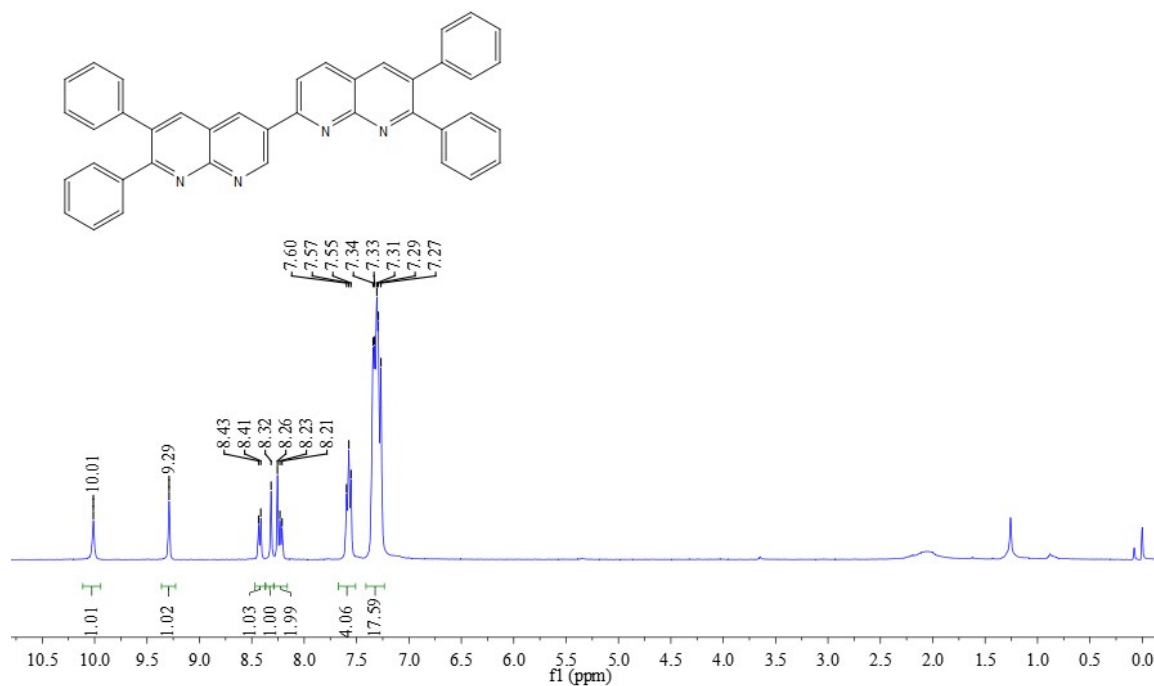

**<sup>13</sup>C-NMR spectrum of 6,6',7,7'-tetrakis(4-phenyl)-2,3'-bi(1,8-naphthyridine) (2ee')**

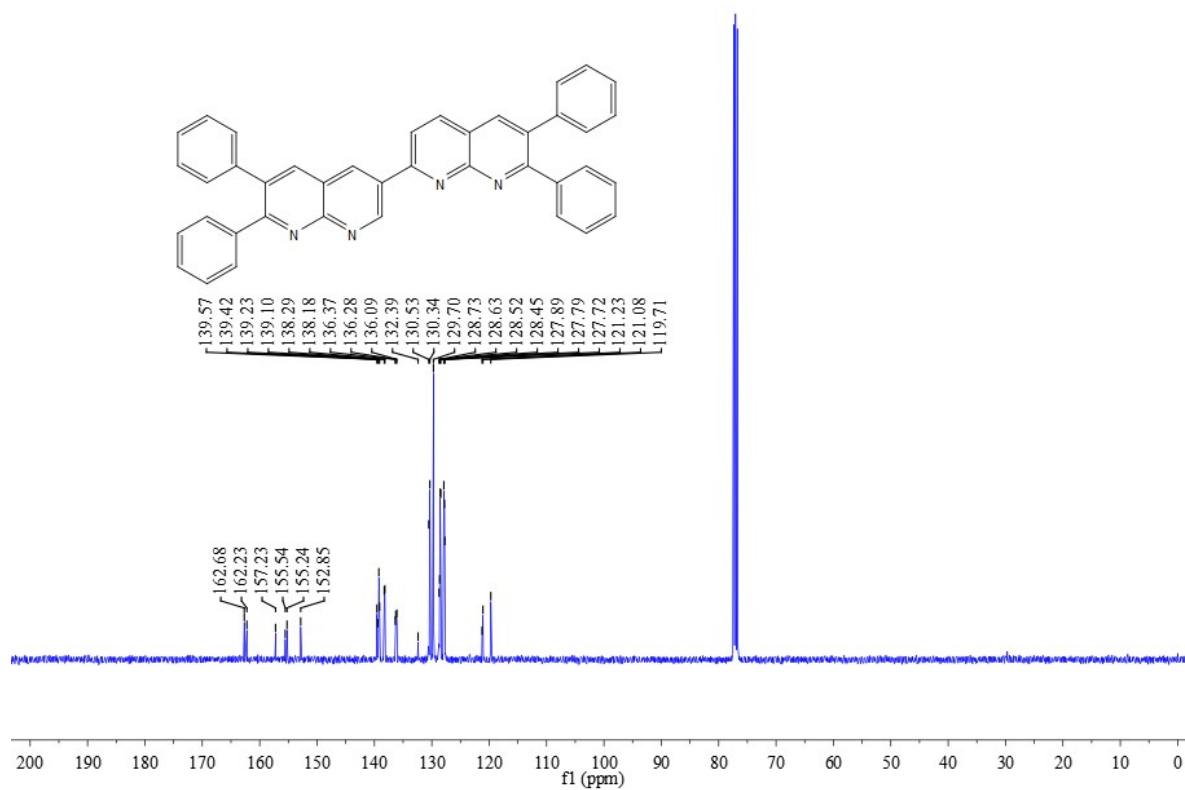

**<sup>1</sup>H-NMR spectrum of 6,6',7,7'-tetrakis(4-methoxyphenyl)-2,3'-bi(1,8-naphthyridine)**

(2ff')

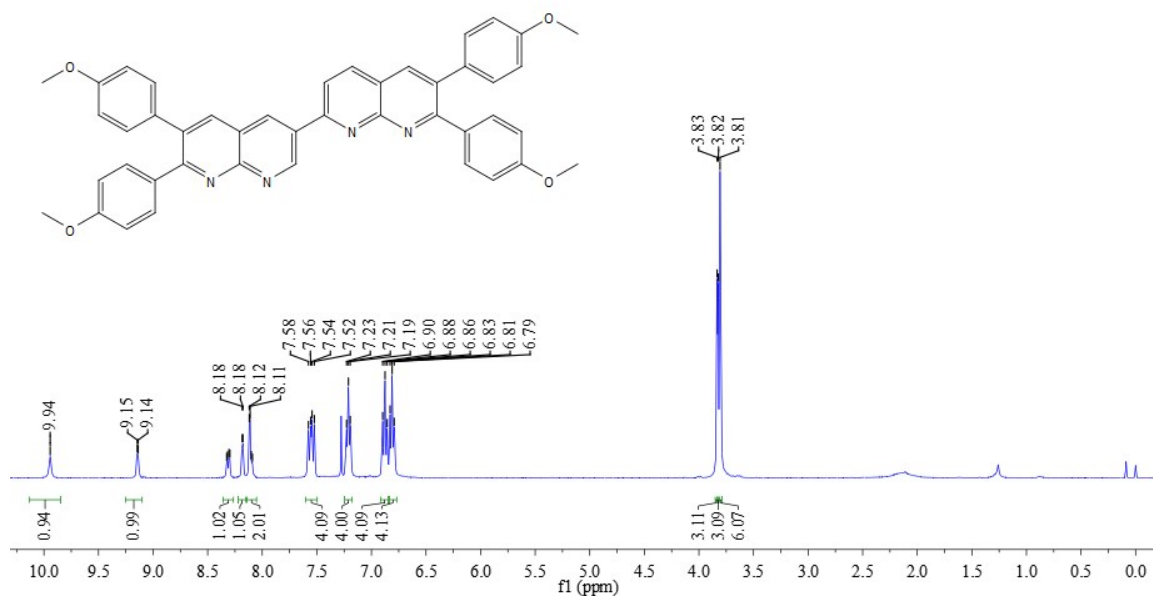

<sup>13</sup>C-NMR spectrum of 6,6',7,7'-tetrakis(4-methoxyphenyl)-2,3'-bi(1,8-naphthyridine) (2ff')

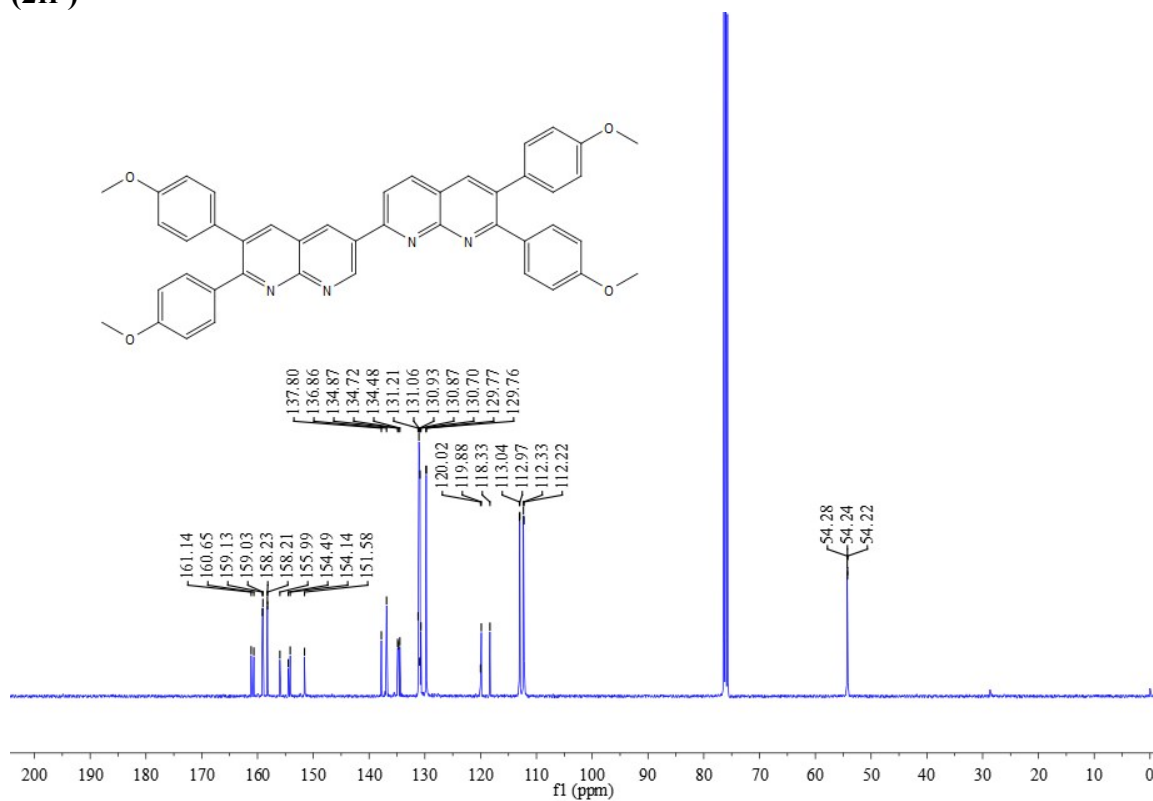

<sup>1</sup>H-NMR spectrum of 2,3'-bi(1,8-naphthyridine) (2gg')

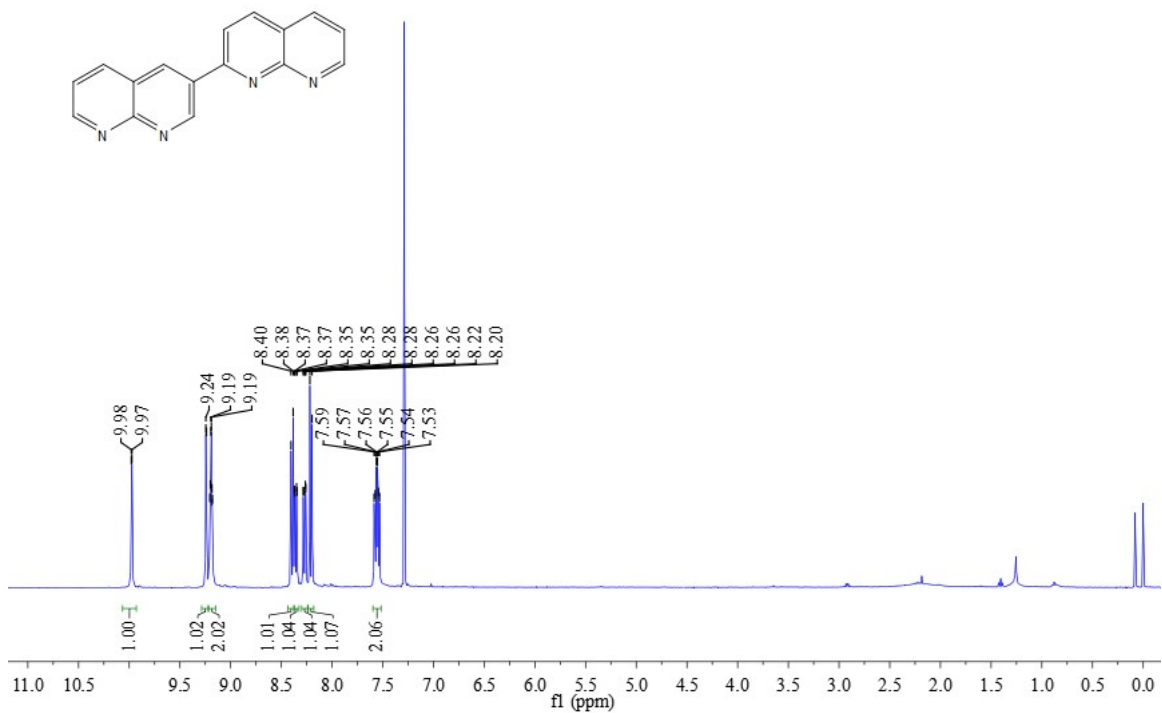

**<sup>13</sup>C-NMR spectrum of 2,3'-bi(1,8-naphthyridine) (2gg')**

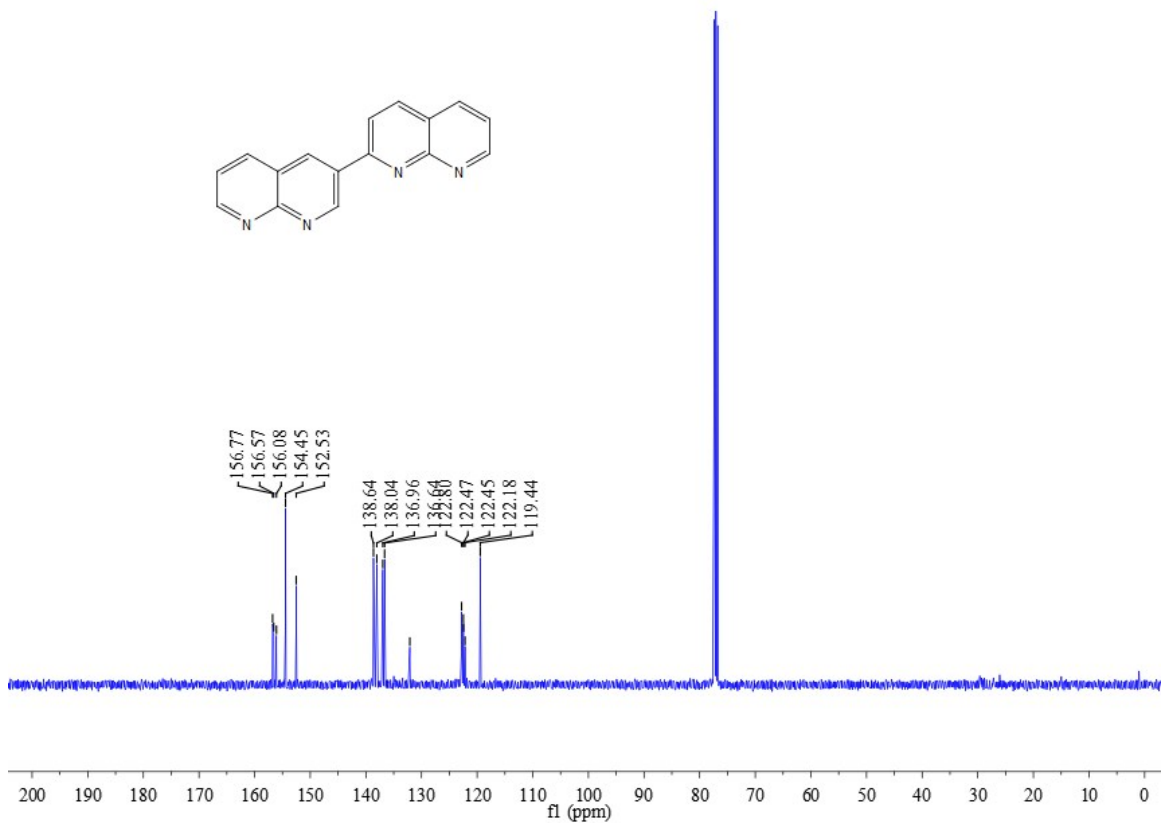

**<sup>1</sup>H-NMR spectrum of 7,7'-dimethyl-2,3'-bi(1,8-naphthyridine) (2hh')**



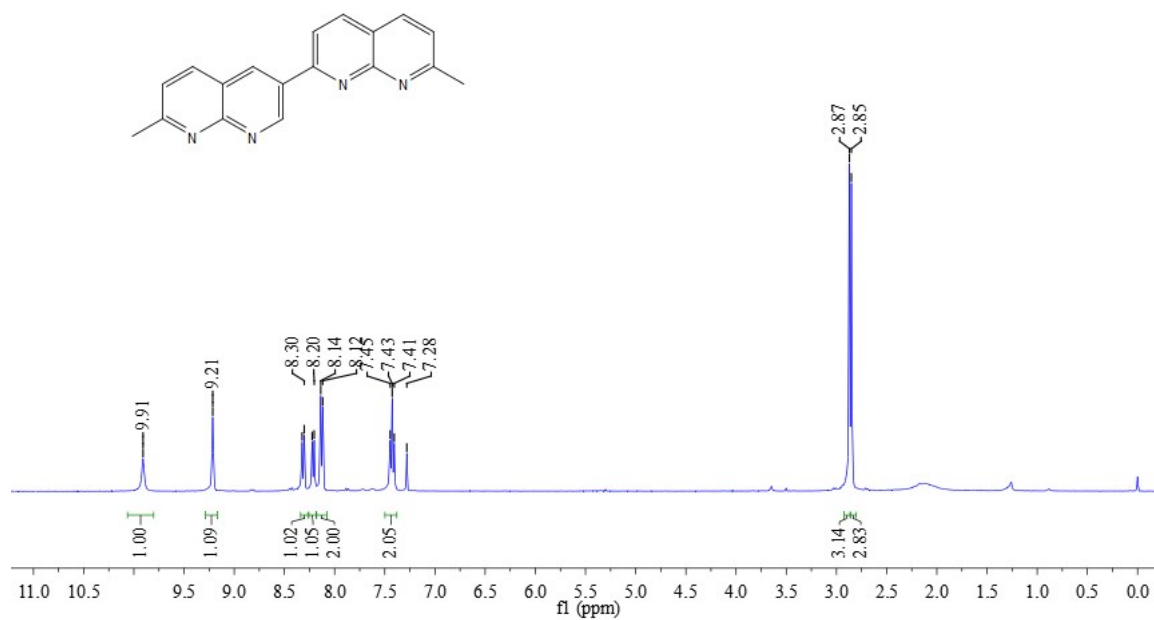

**<sup>13</sup>C-NMR spectrum of 7,7'-dimethyl-2,3'-bi(1,8-naphthyridine) (2hh')**

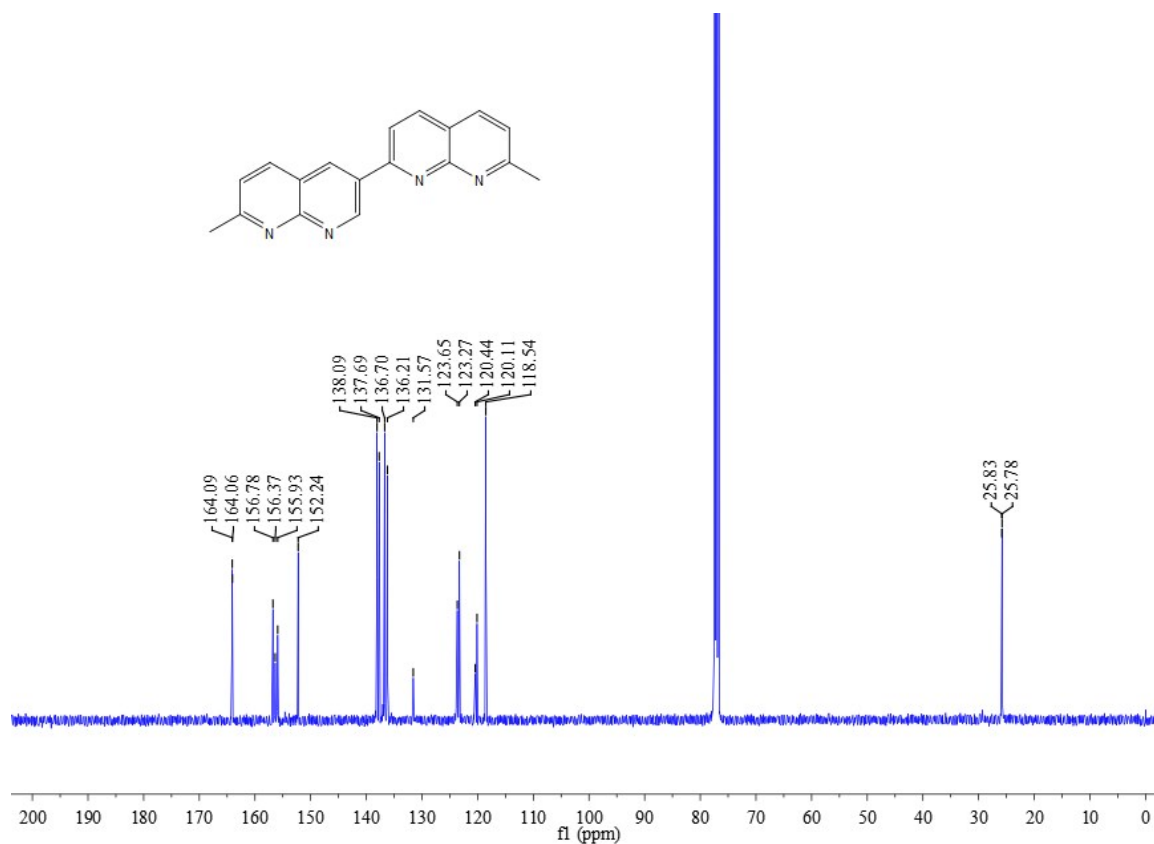

**<sup>1</sup>H-NMR spectrum of 6,6'-dimethyl-7,7'-diphenyl-2,3'-bi(1,8-naphthyridine) (2ii')**

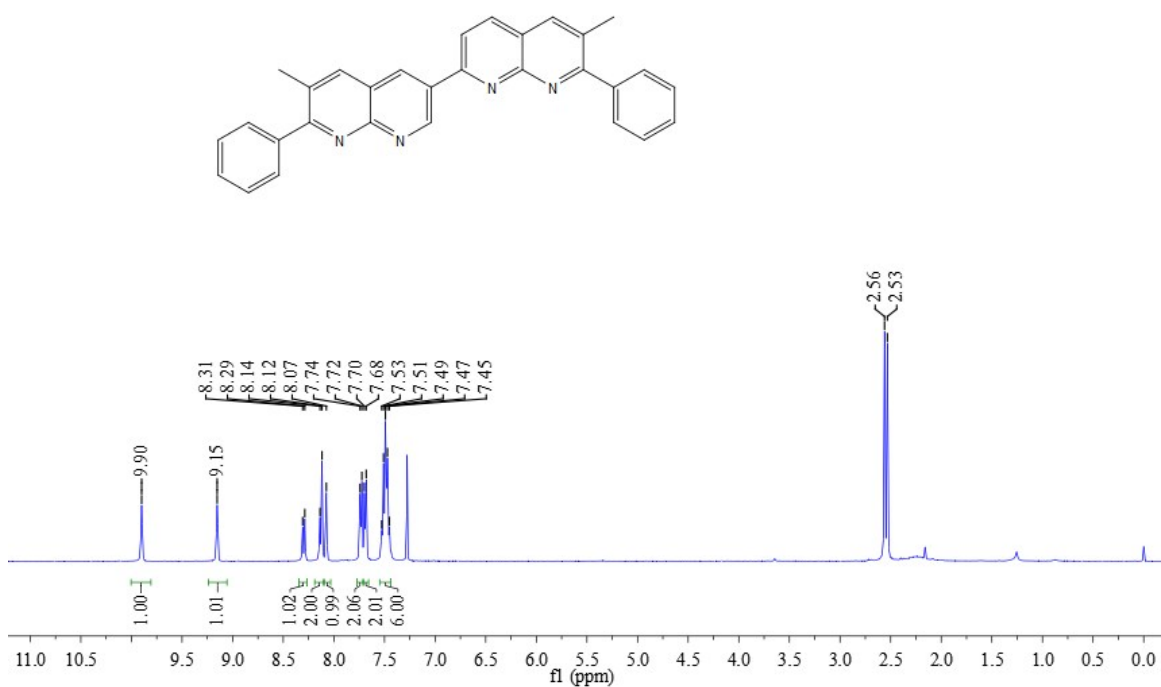

<sup>13</sup>C-NMR spectrum of 6,6'-dimethyl-7,7'-diphenyl-2,3'-bi(1,8-naphthyridine) (2ii')

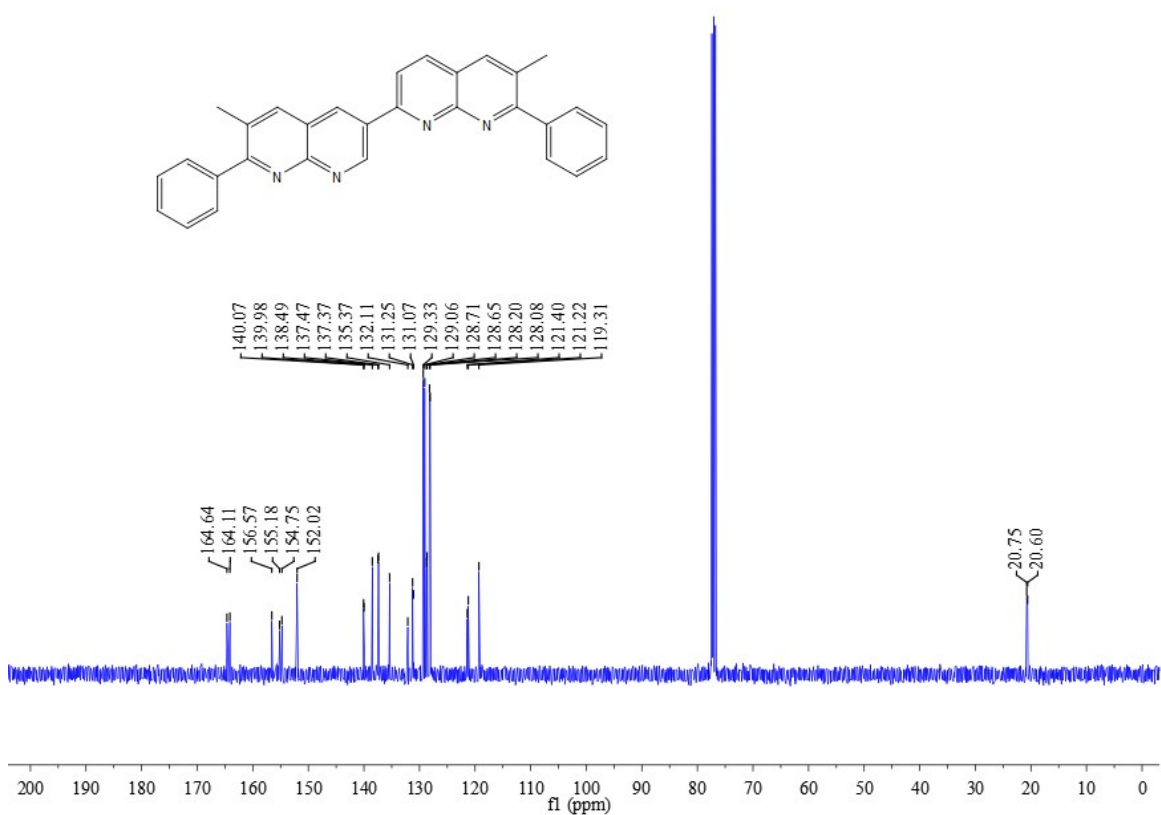

<sup>1</sup>H-NMR spectrum of 6,6'-diethyl-7,7'-diphenyl-2,3'-bi(1,8-naphthyridine) (2jj')

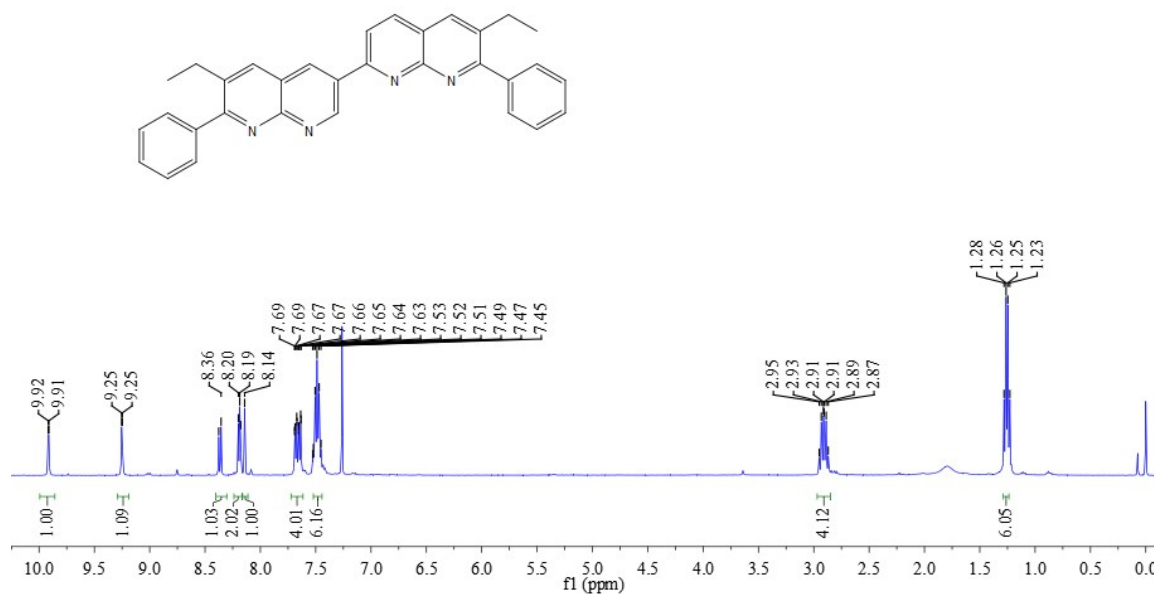

<sup>13</sup>C-NMR spectrum of 6,6'-diethyl-7,7'-diphenyl-2,3'-bi(1,8-naphthyridine) (2jj')

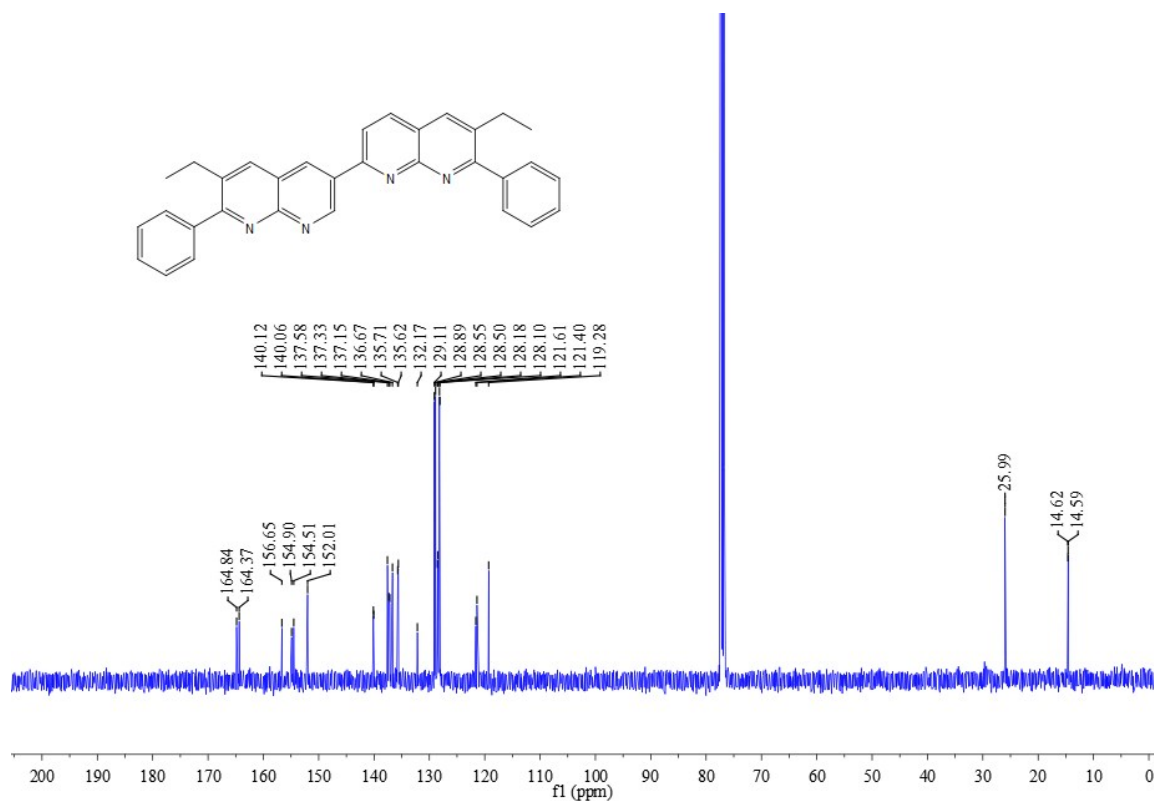

<sup>1</sup>H-NMR spectrum of 7,7'-bis(2-fluorophenyl)-6,6'-dimethyl-2,3'-bi (1,8-naphthyridine)

(2kk')

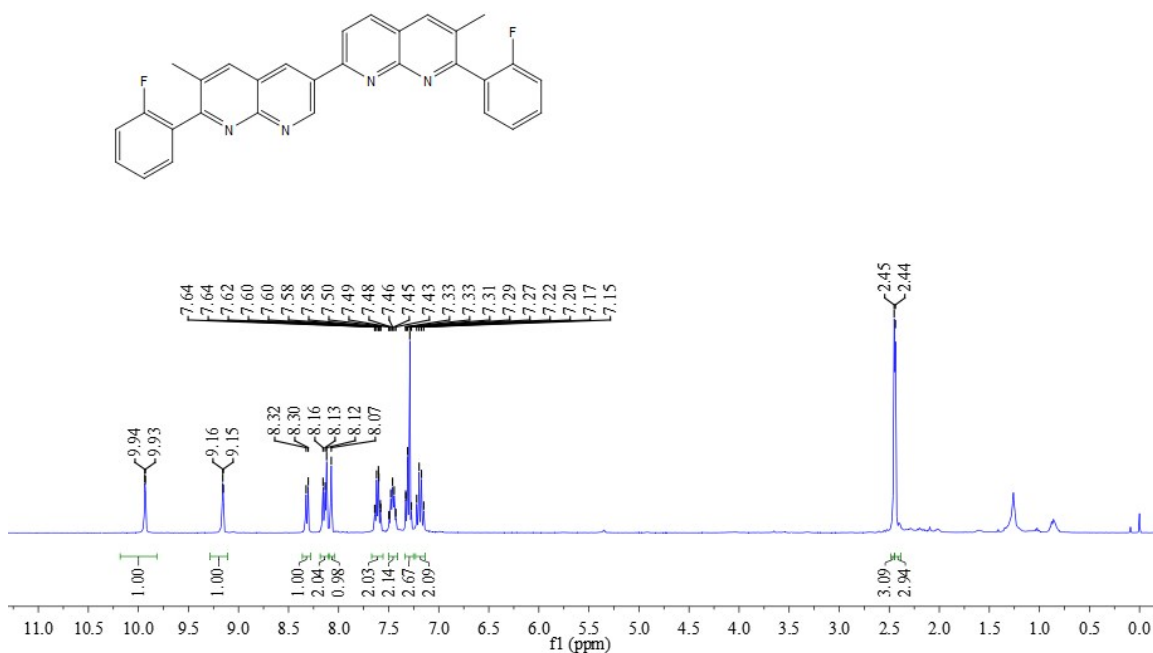

<sup>13</sup>C-NMR spectrum of 7,7'-bis(2-fluorophenyl)-6,6'-dimethyl-2,3'-bi(1,8-naphthyridine) (2kk')

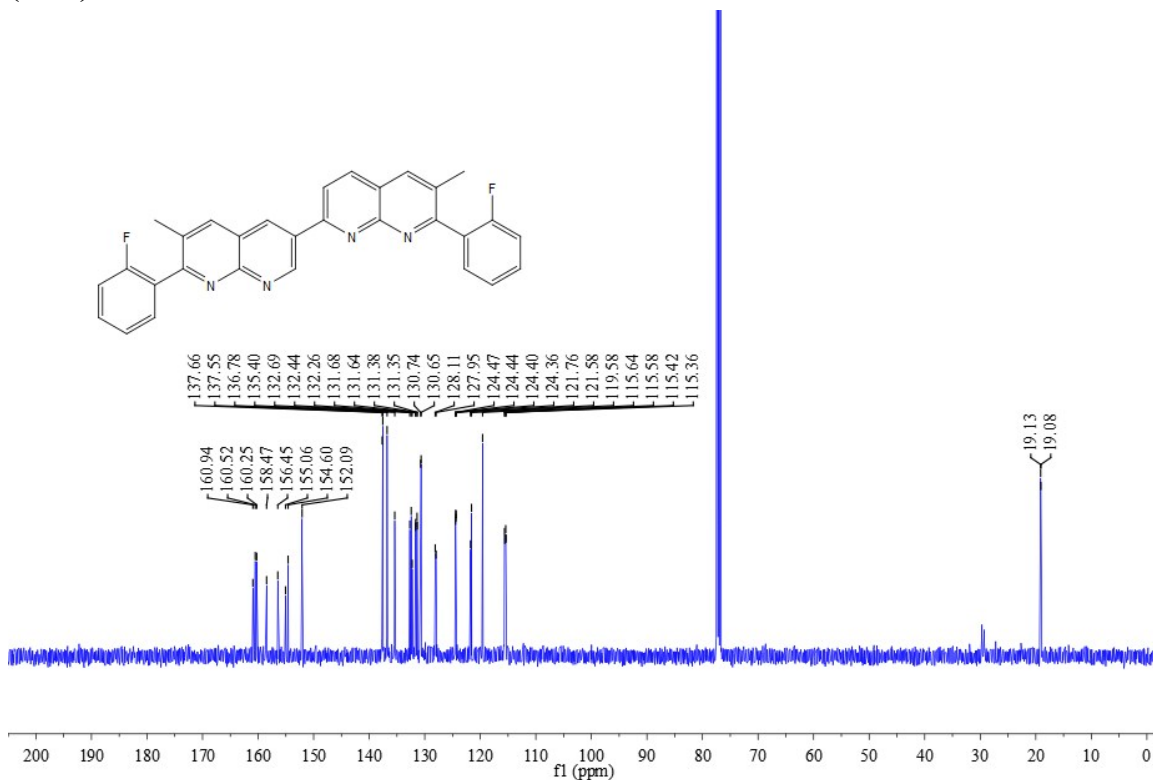

<sup>1</sup>H-NMR spectrum of 5,5',6,6'-tetrahydro-9,10'-binaphtho[1,2-b] [1,8] naphthyridine

(2II')

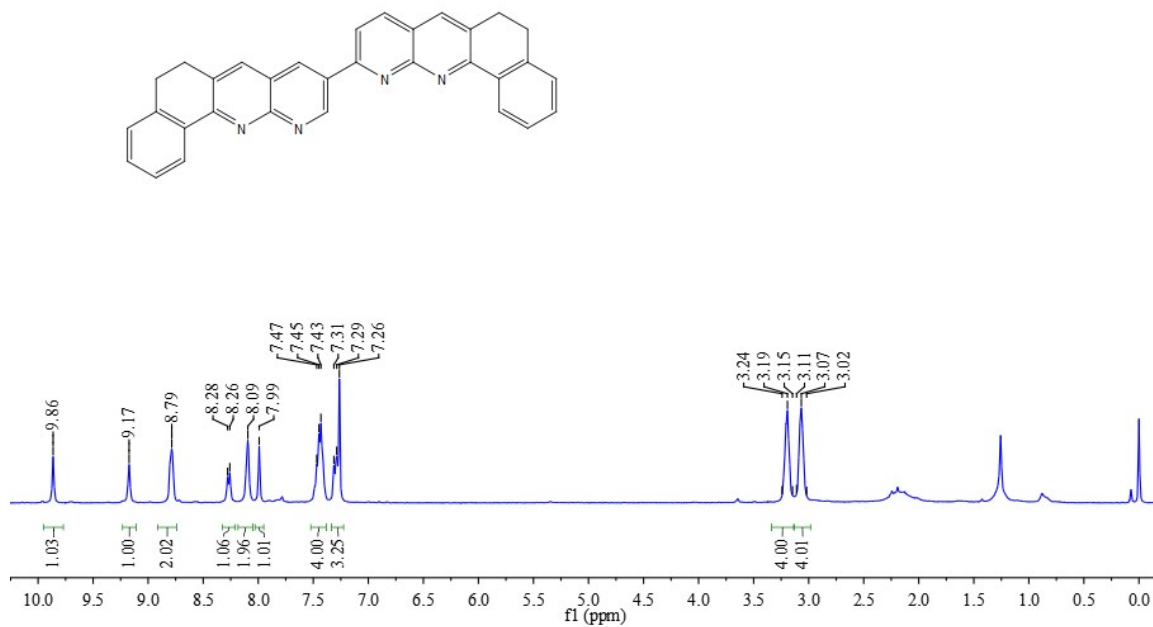

<sup>13</sup>C-NMR spectrum of 5,5',6,6'-tetrahydro-9,10'-binaphtho[1,2-b][1,8]naphthyridine

(2II')

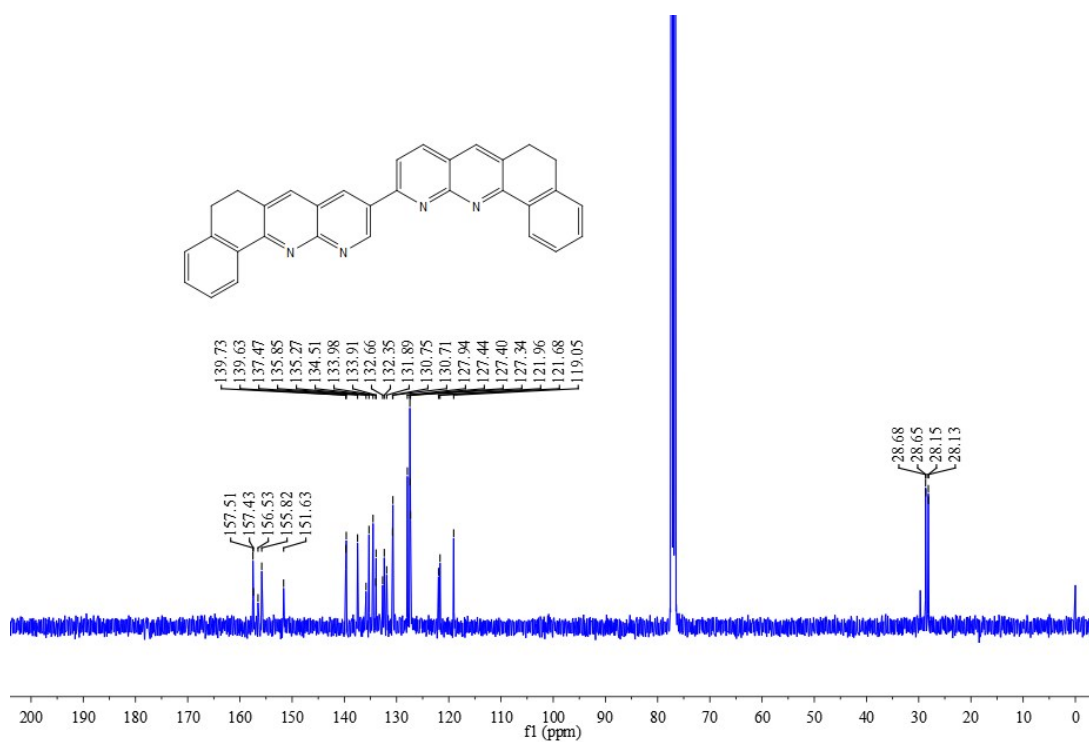

<sup>1</sup>H-NMR spectrum of 2,3'-biquinoline (2mm')

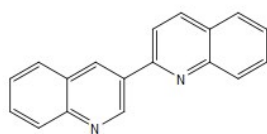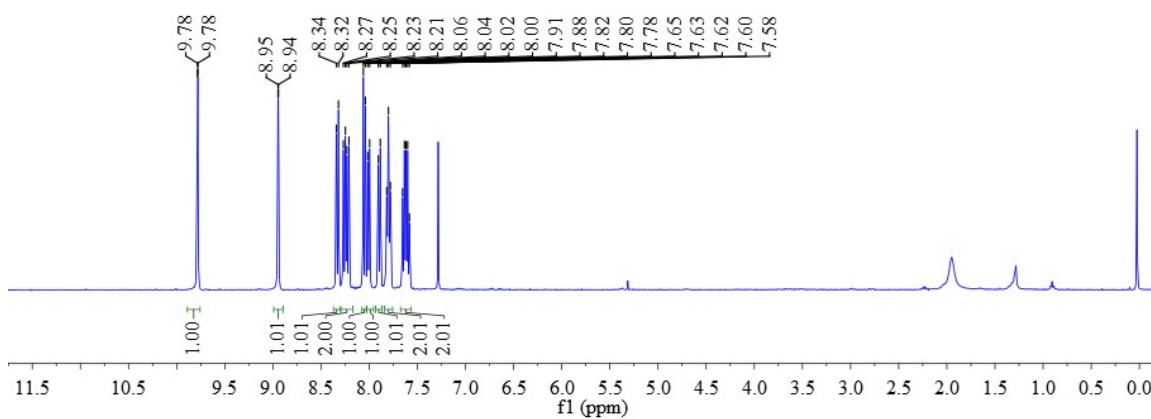

**<sup>13</sup>C-NMR spectrum of 2,3'-biquinoline (2mm')**

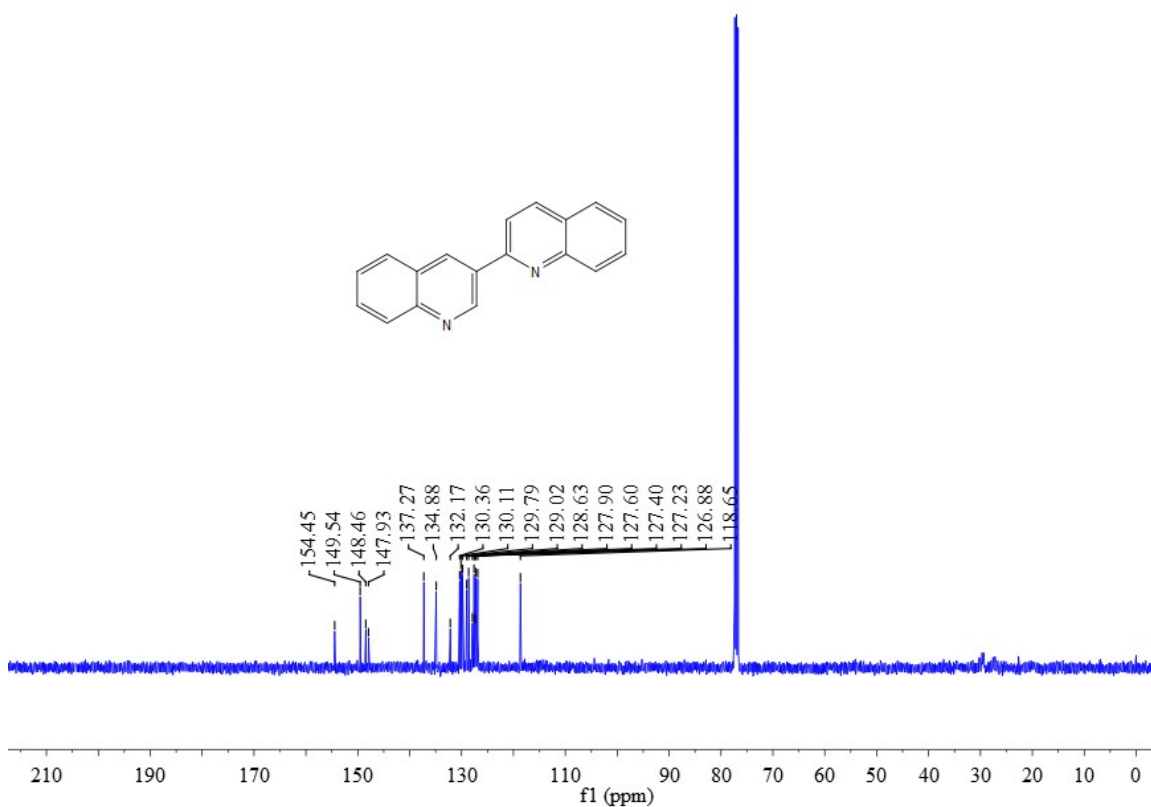

**<sup>1</sup>H-NMR spectrum of 6,6'-dimethyl-2,3'-biquinoline (2nn')**

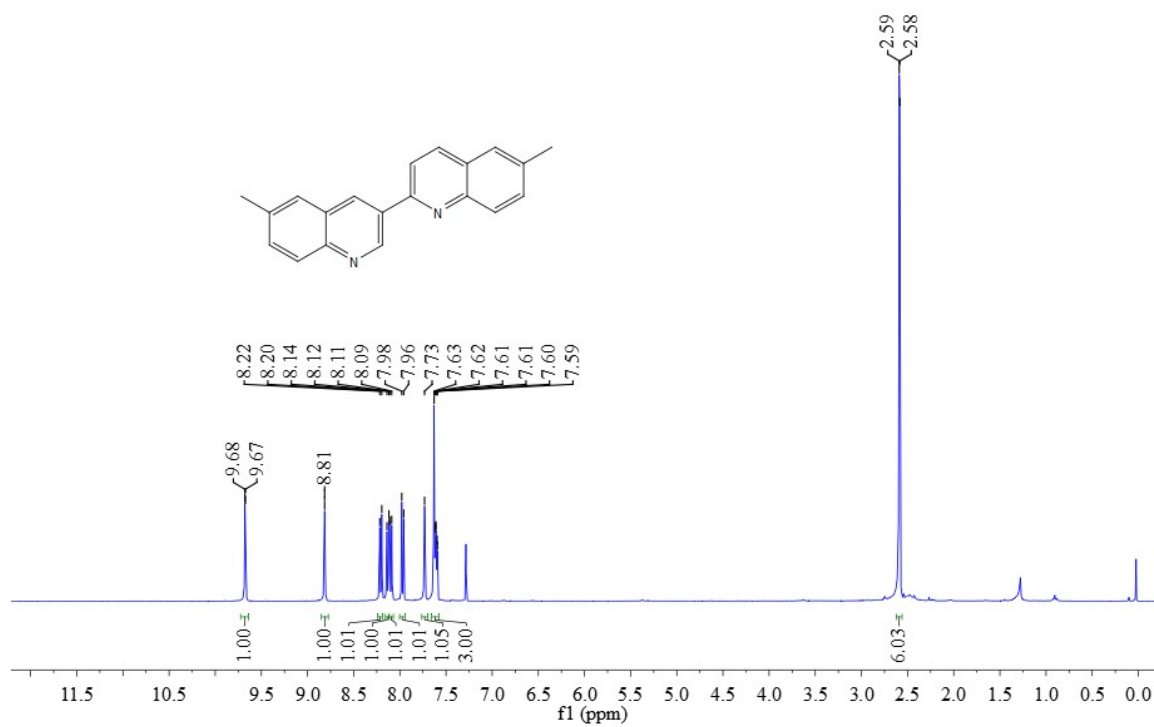

**<sup>13</sup>C-NMR spectrum of 6,6'-dimethyl-2,3'-biquinoline (2nn')**

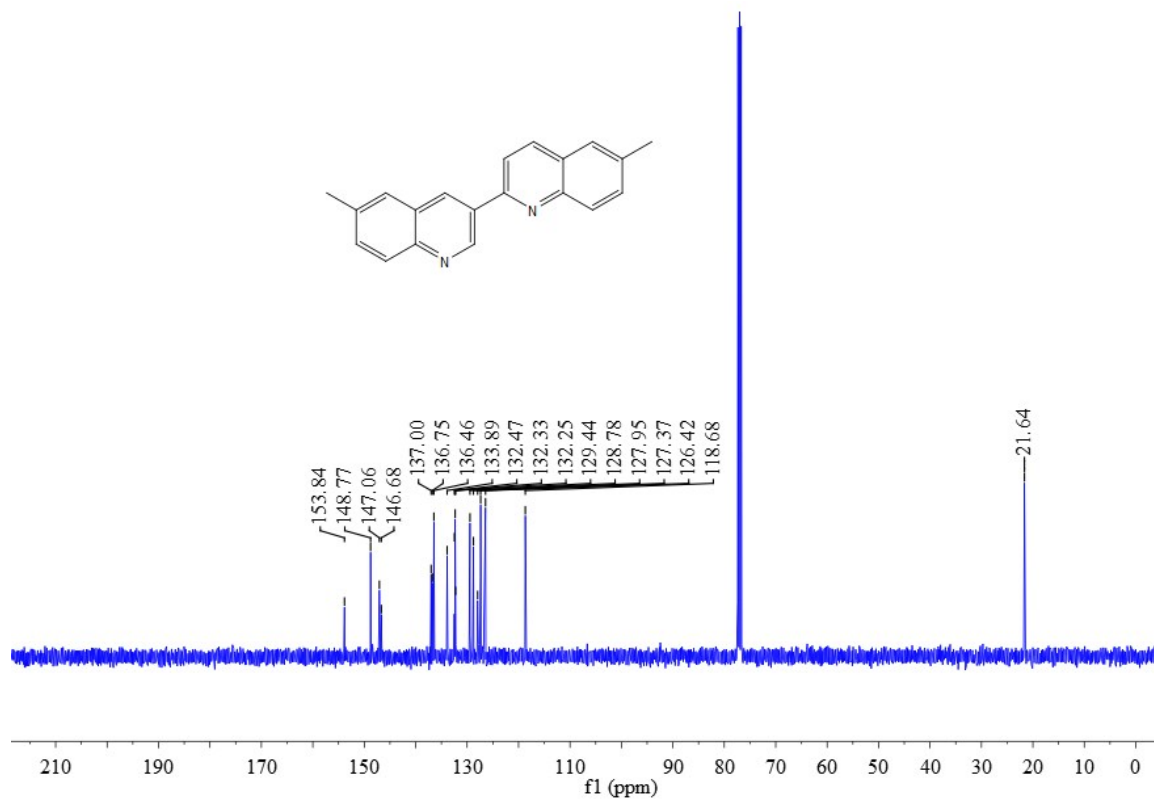

**<sup>1</sup>H-NMR spectrum of 5,5'-dimethoxy-2,3'-biquinoline (2oo')**

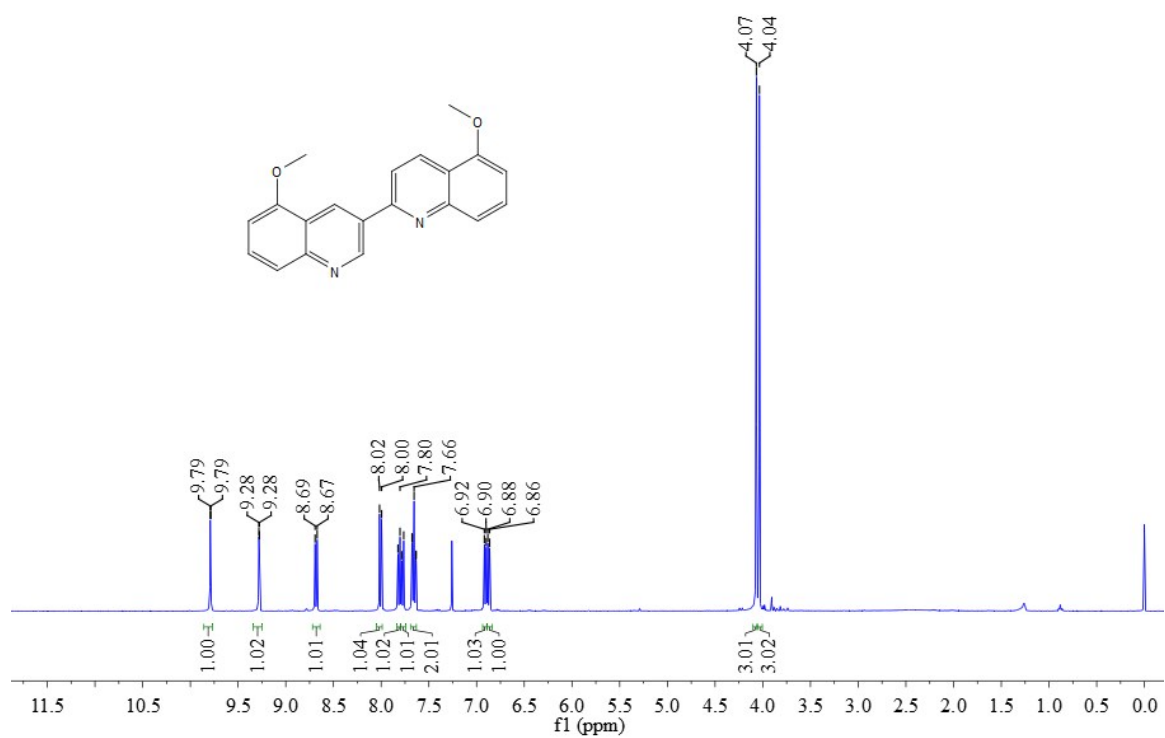

**<sup>13</sup>C-NMR spectrum of 5,5'-dimethoxy-2,3'-biquinoline (200')**

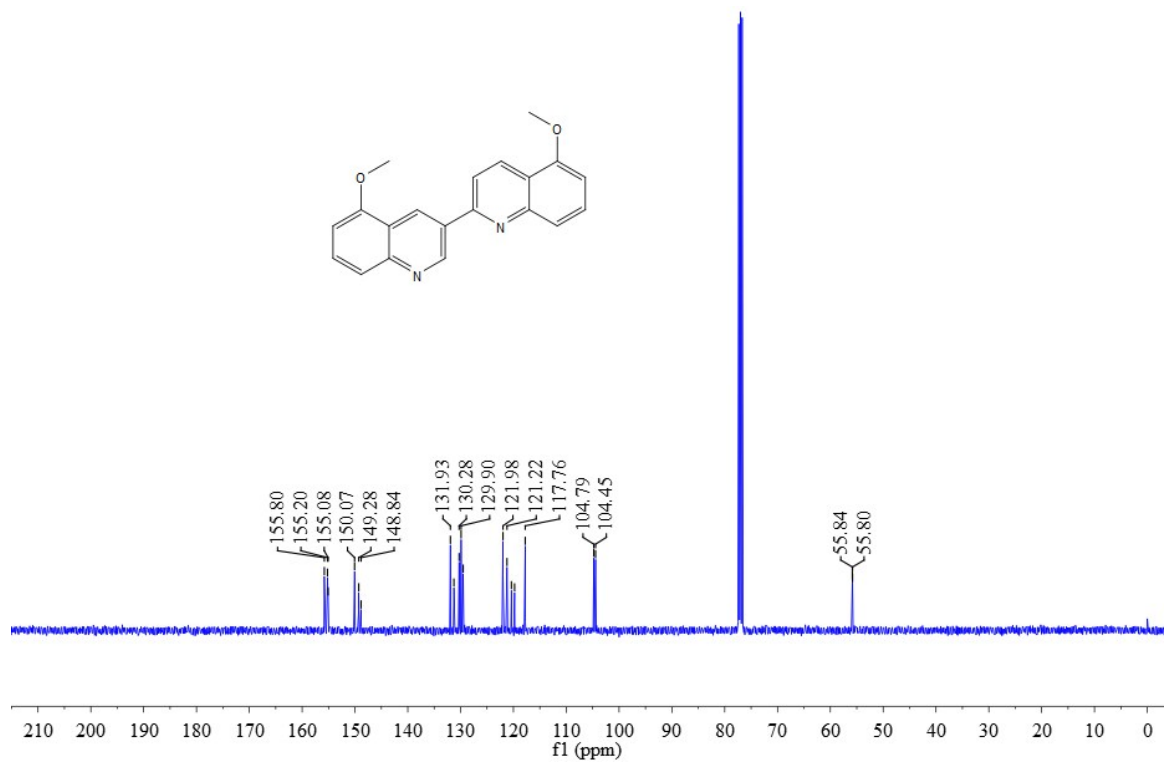

**<sup>1</sup>H-NMR spectrum of 2,2',3,3'-tetraphenyl-6,7'-bipyrido[2,3-b]pyrazine (2pp')**



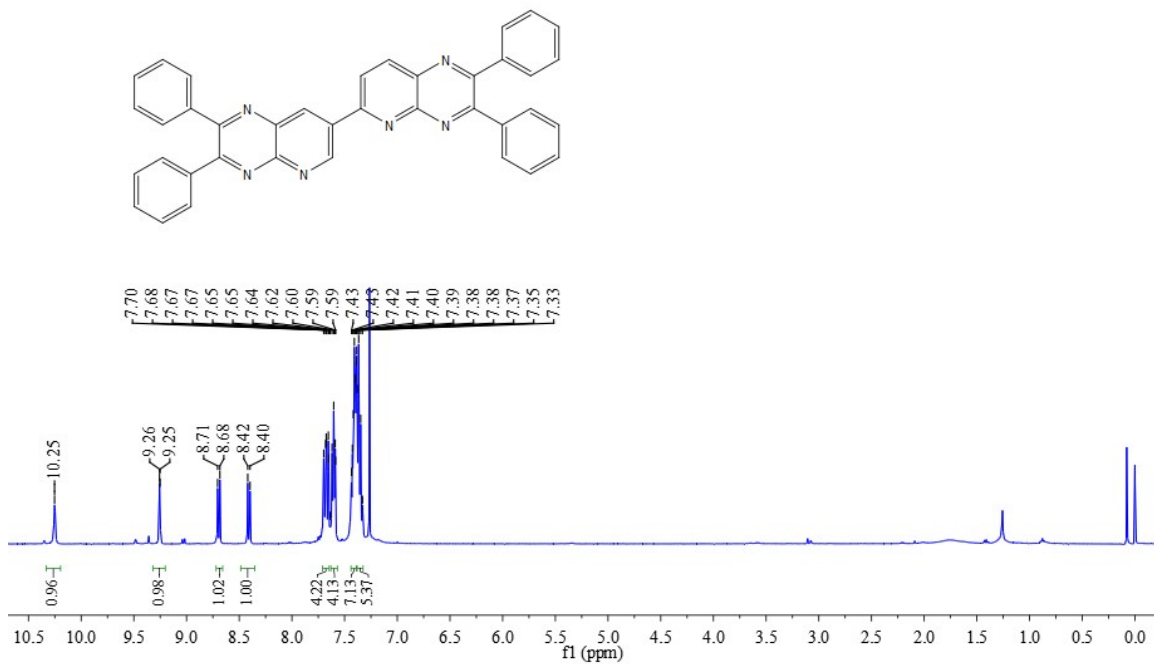

<sup>13</sup>C-NMR spectrum of 2,2',3,3'-tetraphenyl-6,7'-bipyrido[2,3-b]pyrazine (2pp')

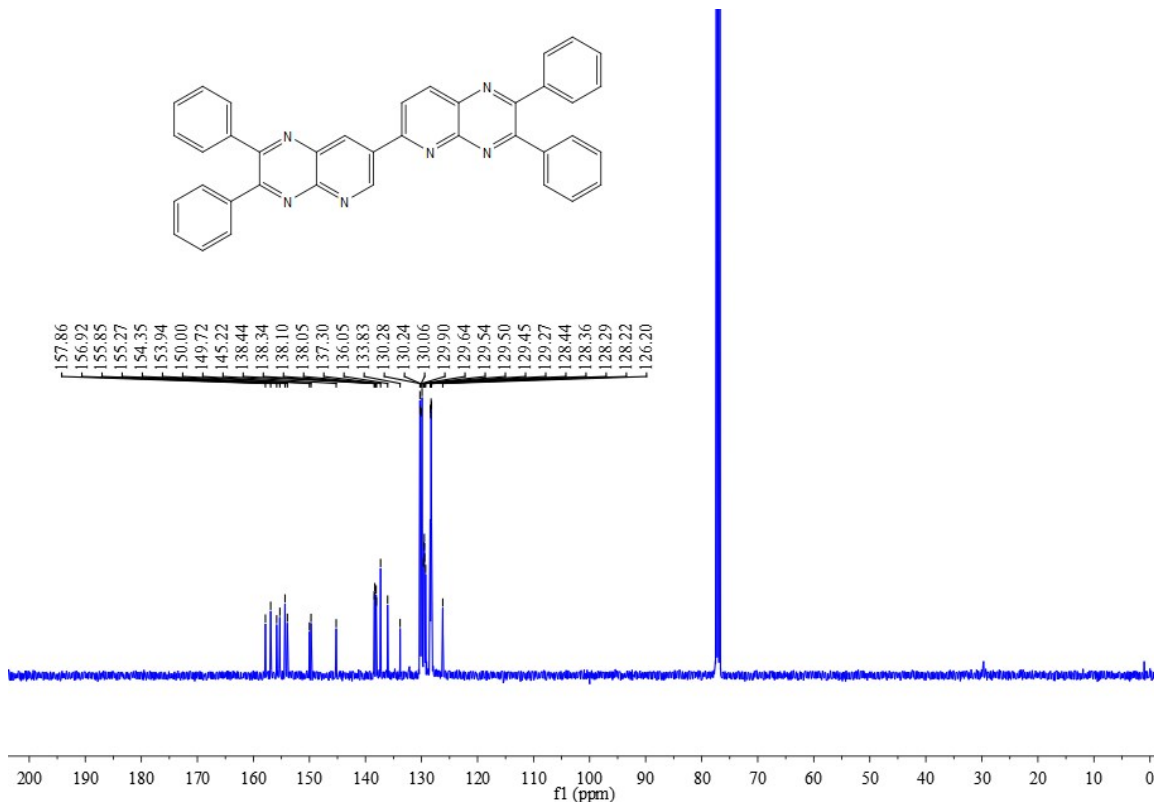

<sup>1</sup>H-NMR spectrum of 2,3'-bi(1,10-phenanthroline) (2qq')

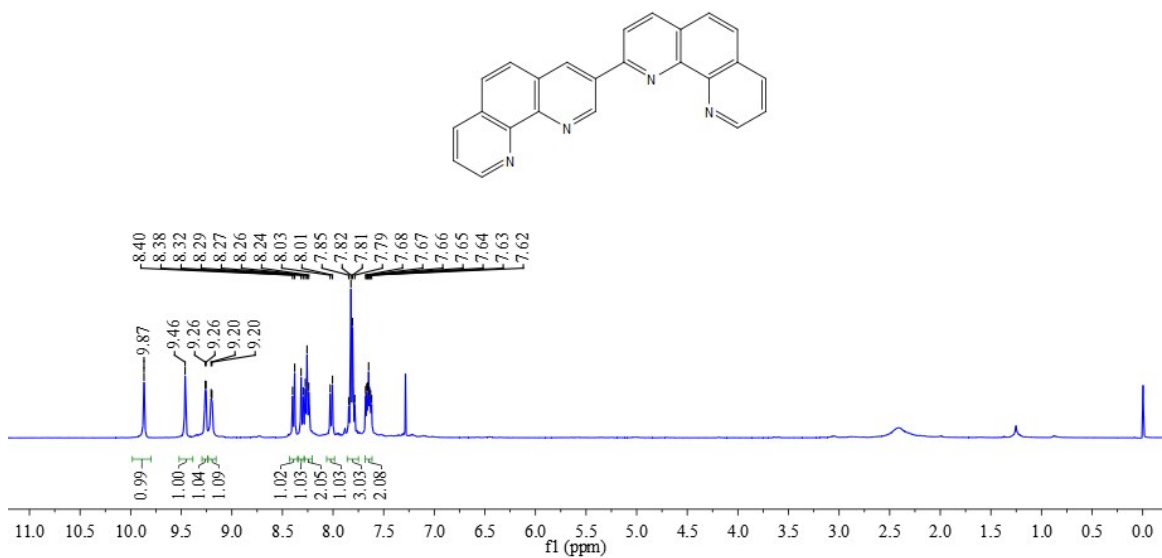

**<sup>13</sup>C-NMR spectrum of 2,3'-bi(1,10-phenanthroline) (2qq')**

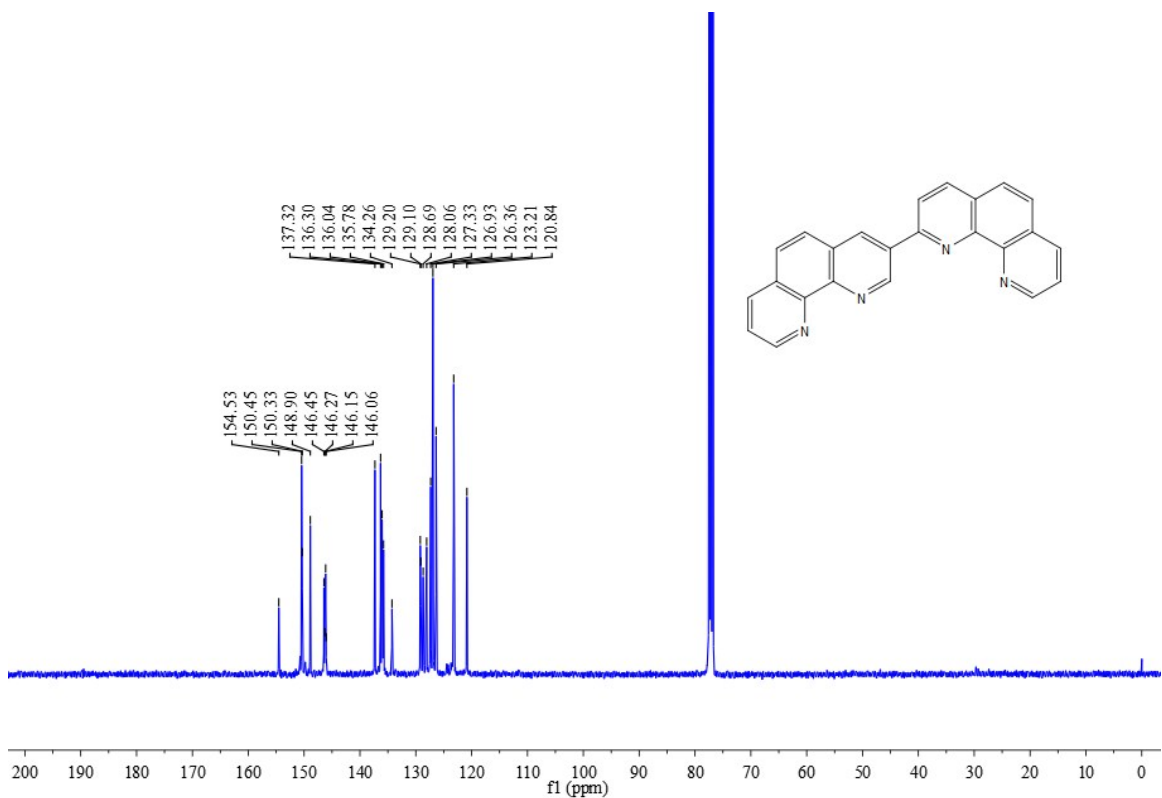

# <sup>1</sup>H-NMR spectrum of 2ag' and 2ga'

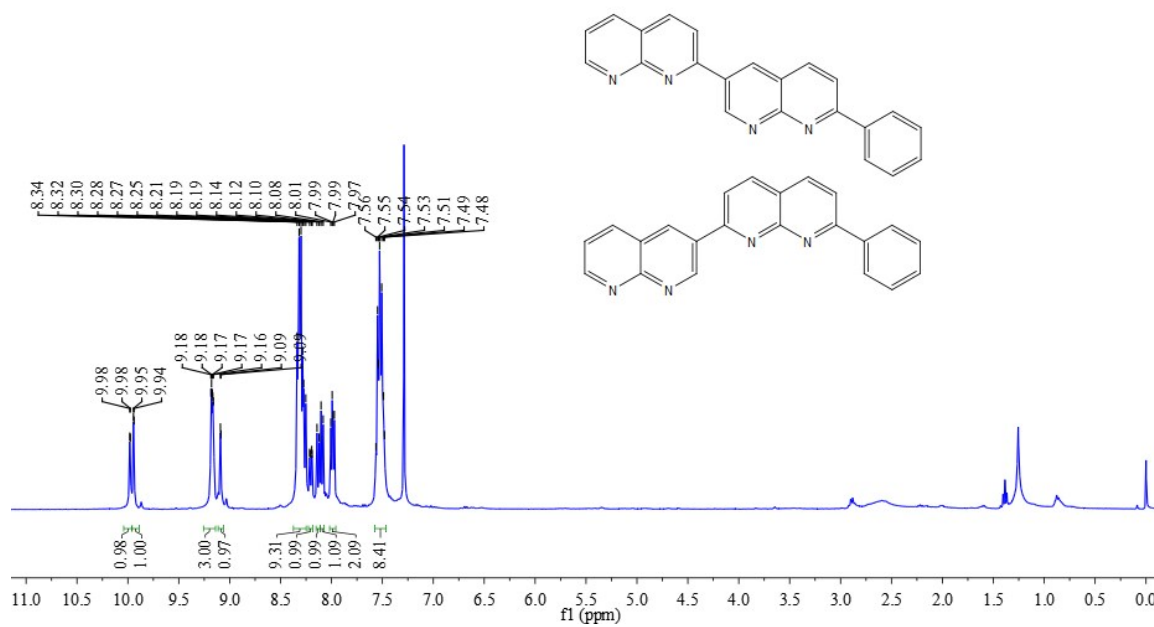

Supplement: c7ob01434a1.pdf [file c7ob01434a1.pdf]
